# Supplementary material
Source: PubMed Central journal article supplement (PMC4256767)
Supplement: 0cd0d687c1ce0a0b774a71e7fdec81fa_genetics.114.167775-2.pdf [file 0cd0d687c1ce0a0b774a71e7fdec81fa_genetics.114.167775-2.pdf]

**Table S1 Yeast strains used in this study<sup>a</sup>**

| Strain     | Genotype                                                                                                                                                  | Reference                      |
|------------|-----------------------------------------------------------------------------------------------------------------------------------------------------------|--------------------------------|
| W303       | <i>ade2-1oc can1-100 his3-11,15 leu2-3,112 trp1-1 ura3-1</i>                                                                                              |                                |
| CRY1       | MATa                                                                                                                                                      | GEISER <i>et al.</i> (1993)    |
| JTY14      | MATa <i>ade3Δ-100 lys2Δ::HIS3 ndc80(Y465C)</i>                                                                                                            | This study                     |
| JTY23      | MATa <i>ade3Δ-100 lys2Δ::HIS3 ndc80(I469Q)</i>                                                                                                            | This study                     |
| JTY8       | MATa <i>ade3Δ-100 lys2Δ::HIS3 ndc80-121</i>                                                                                                               | This study                     |
| JTY13      | MATa <i>ade3Δ-100 lys2Δ::HIS3 ndc80(S467A S468A)</i>                                                                                                      | This study                     |
| JTY17      | MATa <i>ade3Δ-100 lys2Δ::HIS3 ndc80(S467D S468D)</i>                                                                                                      | This study                     |
| JTY18      | MATa <i>ade3Δ-100 lys2Δ::HIS3 ndc80(D466G)</i>                                                                                                            | This study                     |
| JTY30-4A   | MATa <i>ade3Δ-100 NUF2-TAP::KanMX NDC80</i>                                                                                                               | This study                     |
| JTY30-1A   | MATa <i>ade3Δ-100 NUF2-TAP::KanMX ndc80-121</i>                                                                                                           | This study                     |
| JTY58-2D   | MATa <i>ade3Δ-100 lys2Δ::HIS3 SPC110-mCherry::hphMX NDC80</i>                                                                                             | This study                     |
| JTY59-8D   | MATa <i>ade3Δ-100 cyh2' lys2Δ::HIS3 SPC110-mCherry::hphMX ndc80-121</i>                                                                                   | This study                     |
| JTY96-14C  | MATa <i>ade3Δ-100 lys2Δ::HIS3 SPC110-mCherry::hphMX ndc80-121 mad1Δ::URA3</i>                                                                             | This study                     |
| JTY98-4B   | MATa <i>ade3Δ-100 SPC110-mCherry::hphMX ndc80-121 ipl1-321</i>                                                                                            | This study                     |
| JTY9-4A    | MATa <i>ade3Δ-100 URA3::TUB1-GFP SPC110-mCherry::hphMX NDC80</i>                                                                                          | This study                     |
| JTY9-10D   | MATa <i>ade3Δ-100 lys2Δ::HIS3 URA3::TUB1-GFP SPC110-mCherry::hphMX ndc80-121</i>                                                                          | This study                     |
| JTY59-12D  | MATa <i>ade3Δ-100 lys2Δ::HIS3 STU2-GFP::NatMX SPC110-mCherry::hphMX NDC80</i>                                                                             | This study                     |
| JTY59-7A   | MATa <i>ade3Δ-100 lys2Δ::HIS3 STU2-GFP::NatMX SPC110-mCherry::hphMX ndc80-121</i>                                                                         | This study                     |
| JTY73-17C  | MATa <i>ade3Δ-100 lys2Δ::HIS3 STU2-GFP::NatMX SPC110-mCherry::hphMX CDC20-AID::KanMX ura3::pADH1-OsTIR1-9myc::URA3 NDC80</i>                              | This study                     |
| JTY73-2A   | MATa <i>ADE3 STU2-GFP::NatMX SPC110-mCherry::hphMX CDC20-AID::KanMX ura3::pADH1-OsTIR1-9myc::URA3 ndc80-121</i>                                           | This study                     |
| MMWY61#2   | MATa <i>ade3Δ-100 pCUP1-GFP12LacI12::HIS3 CEN3-LacO33array::KanMX SPC110-mCherry::hphMX NDC80</i>                                                         | WARGACKI <i>et al.</i> (2010)  |
| JTY65-16B  | MATa <i>ade3Δ-100 pCUP1-GFP12LacI12::HIS3 CEN3-LacO33array::KanMX SPC110-mCherry::hphMX ndc80-121</i>                                                     | This study                     |
| JTY112-58A | MATa <i>ade3Δ-100 lys2Δ::HIS3 pCUP1-GFP12-LacI12::HIS3 CEN3::33LacO::KanMX SPC110-mCherry::hphMX CDC20-AID::KanMX ura3::pADH1-OsTIR1-9myc::URA3 NDC80</i> | This study                     |
| JTY112-20B | MATa <i>ADE3 lys2Δ::HIS3 pCUP1-GFP12-LacI12::HIS3 CEN3::33LacO::KanMX SPC110-mCherry::hphMX CDC20-AID::KanMX ura3::pADH1-OsTIR1-9myc::URA3 ndc80-121</i>  | This study                     |
| JTY11-5A   | MATa <i>ade3Δ-100 NUF2-GFP::HIS3 SPC110-mCherry::hphMX NDC80</i>                                                                                          | This study                     |
| JTY11-16A  | MATa <i>ade3Δ-100 NUF2-GFP::HIS3 SPC110-mCherry::hphMX ndc80-121</i>                                                                                      | This study                     |
| MSY284-8D  | MATa <i>ade3Δ-100 NUF2-GFP::HIS3 SPC110-mCherry::hphMX ipl1-321</i>                                                                                       | Michelle M. Shimogawa          |
| JTY98-13D  | MATa <i>ade3Δ-100 NUF2-GFP::HIS3 SPC110-mCherry::hphMX ndc80-121 ipl1-321</i>                                                                             | This study                     |
| KGY315     | MATa/MATa <i>ADE3/ade3Δ-100 cyh2'/CYH2<sup>s</sup></i>                                                                                                    | GREENLAND <i>et al.</i> (2010) |
| JTY82      | MATa/MATa <i>ade3Δ-100/ade3Δ-100 cyh2'/cyh2' lys2Δ::HIS3/lys2Δ::HIS3 ndc80-121/ndc80-121</i>                                                              | This study                     |
| JTY74      | MATa/MATa <i>ade3Δ-100/ADE3 cyh2'/CYH2<sup>s</sup> lys2Δ::HIS3/LYS2 ndc80-121/NDC80</i>                                                                   | This study                     |
| JTY83      | MATa <i>ade3Δ-100 lys2Δ::HIS3 ndc80-125</i>                                                                                                               | This study                     |
| JTY81      | MATa/MATa <i>ade3Δ-100/ade3Δ-100 cyh2'/cyh2' lys2Δ::HIS3/lys2Δ::HIS3 ndc80-121/ndc80-125</i>                                                              | This study                     |

| Strain    | Genotype                                                                                                                         | Reference  |
|-----------|----------------------------------------------------------------------------------------------------------------------------------|------------|
| JTY102    | MATa/MATα <i>ade3Δ-100/ade3Δ-100 cyh2<sup>r</sup>/cyh2<sup>r</sup> lys2Δ::HIS3/lys2Δ::HIS3 ndc80-125/ndc80-125</i>               | This study |
| JTY79     | MATa/MATα <i>ade3Δ-100/ADE3 cyh2<sup>r</sup>/CYH2<sup>s</sup> lys2Δ::HIS3/LYS2 ndc80-125/NDC80</i>                               | This study |
| JTY114    | MATa <i>ade3Δ-100 cyh2<sup>r</sup> lys2Δ::HIS3 ndc80-126</i>                                                                     | This study |
| JTY116    | MATa/MATα <i>ade3Δ-100/ade3Δ-100 cyh2<sup>r</sup>/cyh2<sup>r</sup> lys2Δ::HIS3/lys2Δ::HIS3 ndc80-126/ndc80-121</i>               | This study |
| JTY84     | MATa <i>ade3Δ-100 lys2Δ::HIS3 ndc80-121 nuf2-101</i>                                                                             | This study |
| JTY86-5C  | MATa <i>ade3Δ-100 cyh2<sup>r</sup> lys2Δ::HIS3 NDC80 nuf2-101</i>                                                                | This study |
| JTY88     | MATa/MATα <i>ade3Δ-100/ade3Δ-100 cyh2<sup>r</sup>/cyh2<sup>r</sup> lys2Δ::HIS3/lys2Δ::HIS3 ndc80-121/ndc80-121 nuf2-101/NUF2</i> | This study |
| JTY101-6B | MATa <i>ade3Δ-100 cyh2<sup>r</sup> lys2Δ::HIS3 ndc80-125 nuf2-101</i>                                                            | This study |
| JTY101    | MATa/MATα <i>ade3Δ-100/ade3Δ-100 cyh2<sup>r</sup>/cyh2<sup>r</sup> lys2Δ::HIS3/lys2Δ::HIS3 ndc80-121/ndc80-125 nuf2-101/NUF2</i> | This study |

<sup>a</sup>All strains have the same markers as W303 except as noted
