# Supplementary material
Source: PubMed Central journal article supplement (PMC4256767)
Supplement: 0f1f5cfcc54ac354e320d7ab23efcb1a_genetics.114.167775-3.pdf [file 0f1f5cfcc54ac354e320d7ab23efcb1a_genetics.114.167775-3.pdf]

**Table S4 Recombinant Ndc80 complex cross-links**

| Protein<br>1 | Position<br>1 <sup>a</sup> | Protein<br>2            | Position<br>2 <sup>a</sup> | No. PSMs <sup>b</sup> | No.<br>Peptides | Best Peptide<br>q-value |
|--------------|----------------------------|-------------------------|----------------------------|-----------------------|-----------------|-------------------------|
| Ndc80        | 1                          | Ndc80                   | 48                         | 62                    | 1               | 0                       |
| Ndc80        | 1                          | Ndc80                   | 67                         | 15                    | 2               | 0                       |
| Ndc80        | 1                          | Ndc80                   | 69                         | 7                     | 1               | 0                       |
| Ndc80        | 1                          | Ndc80                   | 89                         | 21                    | 1               | 0                       |
| Ndc80        | 1                          | Ndc80                   | 122                        | 4                     | 2               | 0                       |
| Ndc80        | 1                          | Ndc80                   | 140                        | 11                    | 1               | 0                       |
| Ndc80        | 1                          | Ndc80                   | 259                        | 4                     | 1               | 0.001                   |
| Ndc80        | 1                          | Ndc80                   | 292                        | 3                     | 1               | 0                       |
| Ndc80        | 1                          | Ndc80                   | 305                        | 32                    | 1               | 0                       |
| Ndc80        | 1                          | Ndc80                   | 310                        | 6                     | 1               | 0                       |
| Ndc80        | 1                          | Ndc80                   | 332                        | 3                     | 1               | 0                       |
| Ndc80        | 1                          | Ndc80                   | 338                        | 27                    | 1               | 0                       |
| Ndc80        | 1                          | Ndc80                   | 342                        | 1                     | 1               | 0.008                   |
| Ndc80        | 1                          | Ndc80                   | 344                        | 14                    | 1               | 0                       |
| Ndc80        | 1                          | Ndc80                   | 354                        | 1                     | 1               | 0.006                   |
| Ndc80        | 1                          | Ndc80                   | 359                        | 24                    | 1               | 0                       |
| Ndc80        | 1                          | Ndc80                   | 370                        | 16                    | 1               | 0                       |
| Ndc80        | 1                          | Ndc80                   | 388                        | 2                     | 1               | 0.001                   |
| Ndc80        | 1                          | Nuf2                    | 113                        | 3                     | 1               | 0.004                   |
| Ndc80        | 1                          | Nuf2                    | 157                        | 19                    | 1               | 0                       |
| Ndc80        | 1                          | Nuf2                    | 169                        | 4                     | 1               | 0                       |
| Ndc80        | 1                          | Nuf2                    | 200                        | 1                     | 1               | 0.013                   |
| Ndc80        | 1                          | Nuf2                    | 220                        | 11                    | 1               | 0                       |
| Ndc80        | 48                         | Ndc80                   | 67                         | 21                    | 2               | 0                       |
| Ndc80        | 48                         | Ndc80                   | 69                         | 3                     | 1               | 0.008                   |
| Ndc80        | 48                         | Ndc80                   | 89                         | 14                    | 1               | 0                       |
| Ndc80        | 48                         | Ndc80                   | 122                        | 2                     | 1               | 0.001                   |
| Ndc80        | 48                         | Ndc80                   | 138                        | 3                     | 1               | 0.004                   |
| Ndc80        | 48                         | Ndc80                   | 140                        | 2                     | 1               | 0                       |
| Ndc80        | 48                         | Ndc80                   | 231                        | 5                     | 1               | 0                       |
| Ndc80        | 48                         | Ndc80                   | 238                        | 2                     | 1               | 0.004                   |
| Ndc80        | 48                         | Ndc80                   | 259                        | 5                     | 1               | 0                       |
| Ndc80        | 48                         | Ndc80                   | 292                        | 2                     | 1               | 0.002                   |
| Ndc80        | 48                         | Ndc80                   | 305                        | 12                    | 1               | 0                       |
| Ndc80        | 48                         | Ndc80                   | 310                        | 1                     | 1               | 0.043                   |
| Ndc80        | 48                         | Ndc80                   | 332                        | 1                     | 1               | 0.005                   |
| Ndc80        | 48                         | Ndc80                   | 338                        | 12                    | 1               | 0                       |
| Ndc80        | 48                         | Ndc80                   | 354                        | 4                     | 1               | 0.001                   |
| Ndc80        | 48                         | Ndc80                   | 388                        | 2                     | 1               | 0.001                   |
| Ndc80        | 48                         | Nuf2                    | 157                        | 12                    | 1               | 0                       |
| Ndc80        | 48                         | Nuf2                    | 169                        | 6                     | 2               | 0                       |
| Ndc80        | 48                         | Nuf2                    | 220                        | 1                     | 1               | 0                       |
| Ndc80        | 48                         | His <sub>6</sub> -Spc24 | 159                        | 1                     | 1               | 0.023                   |
| Ndc80        | 48                         | His <sub>6</sub> -Spc24 | 225                        | 1                     | 1               | 0.006                   |
| Ndc80        | 67                         | Ndc80                   | 89                         | 21                    | 2               | 0                       |
| Ndc80        | 67                         | Ndc80                   | 122                        | 1                     | 1               | 0.037                   |
| Ndc80        | 67                         | Nuf2                    | 157                        | 6                     | 2               | 0                       |

| Protein<br>1 | Position<br>1 <sup>a</sup> | Protein<br>2            | Position<br>2 <sup>a</sup> | No. PSMs <sup>b</sup> | No.<br>Peptides | Best Peptide<br>q-value |
|--------------|----------------------------|-------------------------|----------------------------|-----------------------|-----------------|-------------------------|
| Ndc80        | 67                         | His <sub>6</sub> -Spc24 | 183                        | 2                     | 1               | 0.004                   |
| Ndc80        | 69                         | Ndc80                   | 89                         | 5                     | 1               | 0                       |
| Ndc80        | 69                         | Ndc80                   | 122                        | 1                     | 1               | 0.002                   |
| Ndc80        | 69                         | Ndc80                   | 231                        | 1                     | 1               | 0.036                   |
| Ndc80        | 69                         | Nuf2                    | 157                        | 3                     | 1               | 0.001                   |
| Ndc80        | 89                         | Ndc80                   | 122                        | 11                    | 2               | 0                       |
| Ndc80        | 89                         | Ndc80                   | 138                        | 8                     | 1               | 0                       |
| Ndc80        | 89                         | Ndc80                   | 140                        | 2                     | 1               | 0                       |
| Ndc80        | 89                         | Ndc80                   | 192                        | 2                     | 1               | 0.001                   |
| Ndc80        | 89                         | Ndc80                   | 231                        | 10                    | 2               | 0                       |
| Ndc80        | 89                         | Ndc80                   | 238                        | 1                     | 1               | 0.004                   |
| Ndc80        | 89                         | Ndc80                   | 259                        | 1                     | 1               | 0                       |
| Ndc80        | 89                         | Nuf2                    | 113                        | 4                     | 1               | 0                       |
| Ndc80        | 89                         | His <sub>6</sub> -Spc24 | 183                        | 1                     | 1               | 0.003                   |
| Ndc80        | 122                        | Ndc80                   | 152                        | 28                    | 4               | 0                       |
| Ndc80        | 122                        | Ndc80                   | 155                        | 40                    | 2               | 0                       |
| Ndc80        | 137                        | Ndc80                   | 140                        | 18                    | 3               | 0                       |
| Ndc80        | 140                        | Ndc80                   | 238                        | 1                     | 1               | 0.003                   |
| Ndc80        | 259                        | Ndc80                   | 332                        | 13                    | 1               | 0                       |
| Ndc80        | 259                        | Nuf2                    | 169                        | 38                    | 4               | 0                       |
| Ndc80        | 332                        | Nuf2                    | 169                        | 3                     | 1               | 0                       |
| Ndc80        | 342                        | Nuf2                    | 193                        | 3                     | 1               | 0.003                   |
| Ndc80        | 344                        | Ndc80                   | 351                        | 8                     | 1               | 0.012                   |
| Ndc80        | 344                        | Ndc80                   | 354                        | 14                    | 1               | 0.001                   |
| Ndc80        | 344                        | Nuf2                    | 157                        | 3                     | 1               | 0.002                   |
| Ndc80        | 344                        | Nuf2                    | 169                        | 23                    | 4               | 0                       |
| Ndc80        | 344                        | Nuf2                    | 187                        | 1                     | 1               | 0.03                    |
| Ndc80        | 351                        | Ndc80                   | 359                        | 21                    | 2               | 0                       |
| Ndc80        | 351                        | Nuf2                    | 187                        | 62                    | 4               | 0.001                   |
| Ndc80        | 354                        | Nuf2                    | 187                        | 52                    | 4               | 0                       |
| Ndc80        | 359                        | Ndc80                   | 370                        | 66                    | 2               | 0                       |
| Ndc80        | 359                        | Ndc80                   | 388                        | 1                     | 1               | 0.004                   |
| Ndc80        | 359                        | Nuf2                    | 157                        | 12                    | 1               | 0                       |
| Ndc80        | 359                        | Nuf2                    | 200                        | 20                    | 3               | 0                       |
| Ndc80        | 359                        | Nuf2                    | 204                        | 1                     | 1               | 0                       |
| Ndc80        | 359                        | Nuf2                    | 217                        | 3                     | 1               | 0                       |
| Ndc80        | 359                        | Nuf2                    | 220                        | 7                     | 1               | 0.001                   |
| Ndc80        | 368                        | Nuf2                    | 201                        | 2                     | 1               | 0.003                   |
| Ndc80        | 368                        | Nuf2                    | 204                        | 40                    | 2               | 0                       |
| Ndc80        | 370                        | Nuf2                    | 217                        | 40                    | 2               | 0.001                   |
| Ndc80        | 370                        | Nuf2                    | 220                        | 118                   | 2               | 0                       |
| Ndc80        | 377                        | Ndc80                   | 388                        | 73                    | 3               | 0.001                   |
| Ndc80        | 377                        | Nuf2                    | 220                        | 70                    | 1               | 0.001                   |
| Ndc80        | 380                        | Ndc80                   | 388                        | 7                     | 1               | 0.003                   |
| Ndc80        | 380                        | Nuf2                    | 220                        | 9                     | 1               | 0.002                   |
| Ndc80        | 382                        | Nuf2                    | 220                        | 12                    | 1               | 0.001                   |
| Ndc80        | 388                        | Nuf2                    | 220                        | 5                     | 1               | 0.002                   |
| Ndc80        | 404                        | Ndc80                   | 409                        | 11                    | 1               | 0                       |

| Protein 1 | Position 1 <sup>a</sup> | Protein 2               | Position 2 <sup>a</sup> | No. PSMs <sup>b</sup> | No. Peptides | Best Peptide q-value |
|-----------|-------------------------|-------------------------|-------------------------|-----------------------|--------------|----------------------|
| Ndc80     | 409                     | Nuf2                    | 246                     | 5                     | 2            | 0                    |
| Ndc80     | 409                     | Nuf2                    | 388                     | 1                     | 1            | 0.012                |
| Ndc80     | 425                     | Ndc80                   | 432                     | 6                     | 2            | 0.003                |
| Ndc80     | 432                     | Nuf2                    | 270                     | 8                     | 1            | 0.002                |
| Ndc80     | 432                     | Nuf2                    | 271                     | 1                     | 1            | 0.009                |
| Ndc80     | 439                     | Ndc80                   | 439                     | 1                     | 1            | 0.011                |
| Ndc80     | 439                     | Ndc80                   | 445                     | 2                     | 1            | 0.023                |
| Ndc80     | 445                     | Ndc80                   | 448                     | 51                    | 3            | 0                    |
| Ndc80     | 445                     | Ndc80                   | 456                     | 1                     | 1            | 0.032                |
| Ndc80     | 448                     | Nuf2                    | 366                     | 2                     | 1            | 0.01                 |
| Ndc80     | 489                     | Ndc80                   | 513                     | 6                     | 2            | 0                    |
| Ndc80     | 489                     | Ndc80                   | 522                     | 1                     | 1            | 0.003                |
| Ndc80     | 513                     | Ndc80                   | 527                     | 8                     | 2            | 0                    |
| Ndc80     | 522                     | Ndc80                   | 527                     | 6                     | 1            | 0.001                |
| Ndc80     | 527                     | Ndc80                   | 537                     | 1                     | 1            | 0.005                |
| Ndc80     | 537                     | Ndc80                   | 548                     | 14                    | 1            | 0.008                |
| Ndc80     | 541                     | Nuf2                    | 322                     | 8                     | 2            | 0                    |
| Ndc80     | 548                     | Ndc80                   | 554                     | 34                    | 2            | 0                    |
| Ndc80     | 548                     | Nuf2                    | 329                     | 1                     | 1            | 0.004                |
| Ndc80     | 551                     | Ndc80                   | 560                     | 2                     | 1            | 0.009                |
| Ndc80     | 554                     | Ndc80                   | 566                     | 1                     | 1            | 0.004                |
| Ndc80     | 554                     | Nuf2                    | 331                     | 205                   | 1            | 0                    |
| Ndc80     | 554                     | His <sub>6</sub> -Spc24 | 36                      | 1                     | 1            | 0.022                |
| Ndc80     | 577                     | Nuf2                    | 366                     | 23                    | 4            | 0                    |
| Ndc80     | 582                     | Nuf2                    | 356                     | 5                     | 1            | 0.001                |
| Ndc80     | 582                     | Nuf2                    | 360                     | 33                    | 3            | 0                    |
| Ndc80     | 582                     | Nuf2                    | 366                     | 6                     | 1            | 0.001                |
| Ndc80     | 598                     | Ndc80                   | 602                     | 15                    | 1            | 0.001                |
| Ndc80     | 598                     | Ndc80                   | 613                     | 1                     | 1            | 0.02                 |
| Ndc80     | 598                     | Ndc80                   | 627                     | 2                     | 1            | 0.013                |
| Ndc80     | 598                     | Nuf2                    | 388                     | 6                     | 1            | 0                    |
| Ndc80     | 598                     | Nuf2                    | 406                     | 2                     | 1            | 0.001                |
| Ndc80     | 602                     | Ndc80                   | 613                     | 56                    | 3            | 0                    |
| Ndc80     | 602                     | Ndc80                   | 627                     | 2                     | 1            | 0.001                |
| Ndc80     | 602                     | Nuf2                    | 388                     | 20                    | 1            | 0.001                |
| Ndc80     | 602                     | Nuf2                    | 390                     | 3                     | 1            | 0                    |
| Ndc80     | 602                     | Nuf2                    | 393                     | 12                    | 2            | 0                    |
| Ndc80     | 602                     | Nuf2                    | 406                     | 2                     | 1            | 0                    |
| Ndc80     | 611                     | Nuf2                    | 382                     | 68                    | 2            | 0                    |
| Ndc80     | 611                     | Nuf2                    | 388                     | 13                    | 3            | 0                    |
| Ndc80     | 611                     | Nuf2                    | 390                     | 107                   | 4            | 0                    |
| Ndc80     | 611                     | Nuf2                    | 393                     | 76                    | 3            | 0                    |
| Ndc80     | 611                     | Nuf2                    | 406                     | 3                     | 1            | 0                    |
| Ndc80     | 611                     | His <sub>6</sub> -Spc24 | 2                       | 5                     | 1            | 0                    |
| Ndc80     | 613                     | Nuf2                    | 388                     | 27                    | 2            | 0                    |
| Ndc80     | 613                     | Nuf2                    | 393                     | 4                     | 1            | 0                    |
| Ndc80     | 613                     | Nuf2                    | 406                     | 3                     | 1            | 0.001                |
| Ndc80     | 627                     | Ndc80                   | 632                     | 10                    | 1            | 0                    |

| Protein 1               | Position 1 <sup>a</sup> | Protein 2               | Position 2 <sup>a</sup> | No. PSMs <sup>b</sup> | No. Peptides | Best Peptide q-value |
|-------------------------|-------------------------|-------------------------|-------------------------|-----------------------|--------------|----------------------|
| Ndc80                   | 627                     | Nuf2                    | 406                     | 1                     | 1            | 0.009                |
| Ndc80                   | 627                     | Nuf2                    | 409                     | 14                    | 4            | 0                    |
| Ndc80                   | 627                     | Nuf2                    | 415                     | 76                    | 6            | 0                    |
| Ndc80                   | 627                     | Nuf2                    | 419                     | 14                    | 1            | 0.001                |
| Ndc80                   | 627                     | His <sub>6</sub> -Spc24 | 2                       | 2                     | 1            | 0                    |
| Ndc80                   | 632                     | Nuf2                    | 406                     | 20                    | 2            | 0                    |
| Ndc80                   | 632                     | Nuf2                    | 409                     | 30                    | 4            | 0                    |
| Ndc80                   | 632                     | His <sub>6</sub> -Spc24 | 2                       | 2                     | 1            | 0.005                |
| Ndc80                   | 632                     | His <sub>6</sub> -Spc24 | 24                      | 20                    | 1            | 0                    |
| Ndc80                   | 641                     | His <sub>6</sub> -Spc24 | 24                      | 64                    | 2            | 0                    |
| Ndc80                   | 641                     | His <sub>6</sub> -Spc24 | 137                     | 3                     | 1            | 0                    |
| Ndc80                   | 655                     | His <sub>6</sub> -Spc24 | 24                      | 23                    | 1            | 0                    |
| Nuf2                    | 187                     | Nuf2                    | 201                     | 1                     | 1            | 0.002                |
| Nuf2                    | 200                     | Nuf2                    | 204                     | 19                    | 1            | 0                    |
| Nuf2                    | 260                     | Nuf2                    | 271                     | 11                    | 1            | 0                    |
| Nuf2                    | 322                     | Nuf2                    | 331                     | 1                     | 1            | 0                    |
| Nuf2                    | 360                     | Nuf2                    | 366                     | 1                     | 1            | 0.047                |
| Nuf2                    | 360                     | Nuf2                    | 375                     | 2                     | 1            | 0.013                |
| Nuf2                    | 360                     | Nuf2                    | 393                     | 1                     | 1            | 0.011                |
| Nuf2                    | 366                     | Nuf2                    | 375                     | 7                     | 1            | 0.001                |
| Nuf2                    | 366                     | Nuf2                    | 419                     | 4                     | 1            | 0.003                |
| Nuf2                    | 375                     | Nuf2                    | 393                     | 1                     | 1            | 0.044                |
| Nuf2                    | 382                     | Nuf2                    | 393                     | 3                     | 1            | 0                    |
| Nuf2                    | 388                     | Nuf2                    | 388                     | 1                     | 1            | 0                    |
| Nuf2                    | 388                     | Nuf2                    | 393                     | 12                    | 2            | 0                    |
| Nuf2                    | 393                     | His <sub>6</sub> -Spc24 | 2                       | 3                     | 1            | 0.011                |
| Nuf2                    | 409                     | His <sub>6</sub> -Spc24 | 2                       | 1                     | 1            | 0.001                |
| Nuf2                    | 415                     | Nuf2                    | 426                     | 16                    | 1            | 0                    |
| His <sub>6</sub> -Spc24 | 2                       | His <sub>6</sub> -Spc24 | 24                      | 50                    | 1            | 0                    |
| His <sub>6</sub> -Spc24 | 2                       | His <sub>6</sub> -Spc24 | 52                      | 11                    | 1            | 0                    |
| His <sub>6</sub> -Spc24 | 24                      | His <sub>6</sub> -Spc24 | 52                      | 1                     | 1            | 0.014                |
| His <sub>6</sub> -Spc24 | 24                      | His <sub>6</sub> -Spc24 | 118                     | 2                     | 1            | 0.006                |
| His <sub>6</sub> -Spc24 | 24                      | His <sub>6</sub> -Spc24 | 143                     | 1                     | 1            | 0.003                |
| His <sub>6</sub> -Spc24 | 24                      | His <sub>6</sub> -Spc24 | 183                     | 2                     | 1            | 0.002                |
| His <sub>6</sub> -Spc24 | 36                      | His <sub>6</sub> -Spc24 | 62                      | 1                     | 1            | 0.002                |
| His <sub>6</sub> -Spc24 | 36                      | His <sub>6</sub> -Spc24 | 118                     | 5                     | 1            | 0.001                |
| His <sub>6</sub> -Spc24 | 36                      | His <sub>6</sub> -Spc24 | 225                     | 4                     | 1            | 0.003                |
| His <sub>6</sub> -Spc24 | 52                      | His <sub>6</sub> -Spc24 | 62                      | 16                    | 1            | 0                    |
| His <sub>6</sub> -Spc24 | 52                      | His <sub>6</sub> -Spc24 | 118                     | 1                     | 1            | 0.009                |
| His <sub>6</sub> -Spc24 | 62                      | His <sub>6</sub> -Spc24 | 71                      | 7                     | 2            | 0                    |
| His <sub>6</sub> -Spc24 | 62                      | His <sub>6</sub> -Spc24 | 75                      | 4                     | 1            | 0.009                |
| His <sub>6</sub> -Spc24 | 62                      | His <sub>6</sub> -Spc24 | 81                      | 1                     | 1            | 0.009                |
| His <sub>6</sub> -Spc24 | 62                      | His <sub>6</sub> -Spc24 | 82                      | 1                     | 1            | 0.004                |
| His <sub>6</sub> -Spc24 | 62                      | His <sub>6</sub> -Spc24 | 137                     | 1                     | 1            | 0.001                |
| His <sub>6</sub> -Spc24 | 62                      | His <sub>6</sub> -Spc24 | 183                     | 4                     | 1            | 0.002                |
| His <sub>6</sub> -Spc24 | 62                      | His <sub>6</sub> -Spc24 | 225                     | 1                     | 1            | 0.013                |
| His <sub>6</sub> -Spc24 | 71                      | His <sub>6</sub> -Spc24 | 81                      | 12                    | 1            | 0.014                |
| His <sub>6</sub> -Spc24 | 71                      | His <sub>6</sub> -Spc24 | 82                      | 6                     | 1            | 0.002                |

| Protein<br>1            | Position<br>1 <sup>a</sup> | Protein<br>2            | Position<br>2 <sup>a</sup> | No. PSMs <sup>b</sup> | No.<br>Peptides | Best Peptide<br>q-value |
|-------------------------|----------------------------|-------------------------|----------------------------|-----------------------|-----------------|-------------------------|
| His <sub>6</sub> -Spc24 | 71                         | His <sub>6</sub> -Spc24 | 118                        | 1                     | 1               | 0.027                   |
| His <sub>6</sub> -Spc24 | 71                         | His <sub>6</sub> -Spc24 | 137                        | 4                     | 1               | 0.039                   |
| His <sub>6</sub> -Spc24 | 75                         | His <sub>6</sub> -Spc24 | 82                         | 23                    | 1               | 0.005                   |
| His <sub>6</sub> -Spc24 | 82                         | His <sub>6</sub> -Spc24 | 92                         | 18                    | 2               | 0                       |
| His <sub>6</sub> -Spc24 | 82                         | His <sub>6</sub> -Spc24 | 110                        | 4                     | 1               | 0                       |
| His <sub>6</sub> -Spc24 | 82                         | His <sub>6</sub> -Spc24 | 118                        | 4                     | 1               | 0.002                   |
| His <sub>6</sub> -Spc24 | 82                         | His <sub>6</sub> -Spc24 | 137                        | 6                     | 1               | 0.004                   |
| His <sub>6</sub> -Spc24 | 82                         | His <sub>6</sub> -Spc24 | 225                        | 5                     | 1               | 0.01                    |
| His <sub>6</sub> -Spc24 | 92                         | His <sub>6</sub> -Spc24 | 118                        | 5                     | 2               | 0                       |
| His <sub>6</sub> -Spc24 | 92                         | His <sub>6</sub> -Spc24 | 155                        | 1                     | 1               | 0.004                   |
| His <sub>6</sub> -Spc24 | 92                         | His <sub>6</sub> -Spc24 | 225                        | 1                     | 1               | 0.001                   |
| His <sub>6</sub> -Spc24 | 110                        | His <sub>6</sub> -Spc24 | 118                        | 425                   | 1               | 0                       |
| His <sub>6</sub> -Spc24 | 110                        | His <sub>6</sub> -Spc24 | 137                        | 2                     | 1               | 0                       |
| His <sub>6</sub> -Spc24 | 110                        | His <sub>6</sub> -Spc24 | 139                        | 6                     | 1               | 0                       |
| His <sub>6</sub> -Spc24 | 110                        | His <sub>6</sub> -Spc24 | 143                        | 5                     | 1               | 0                       |
| His <sub>6</sub> -Spc24 | 110                        | His <sub>6</sub> -Spc24 | 155                        | 5                     | 1               | 0.004                   |
| His <sub>6</sub> -Spc24 | 110                        | His <sub>6</sub> -Spc24 | 204                        | 1                     | 1               | 0.002                   |
| His <sub>6</sub> -Spc24 | 110                        | His <sub>6</sub> -Spc24 | 225                        | 5                     | 1               | 0                       |
| His <sub>6</sub> -Spc24 | 115                        | His <sub>6</sub> -Spc24 | 225                        | 1                     | 1               | 0.001                   |
| His <sub>6</sub> -Spc24 | 118                        | His <sub>6</sub> -Spc24 | 139                        | 4                     | 1               | 0.016                   |
| His <sub>6</sub> -Spc24 | 118                        | His <sub>6</sub> -Spc24 | 143                        | 6                     | 1               | 0.001                   |
| His <sub>6</sub> -Spc24 | 118                        | His <sub>6</sub> -Spc24 | 155                        | 11                    | 1               | 0.002                   |
| His <sub>6</sub> -Spc24 | 118                        | His <sub>6</sub> -Spc24 | 159                        | 6                     | 1               | 0                       |
| His <sub>6</sub> -Spc24 | 118                        | His <sub>6</sub> -Spc24 | 181                        | 3                     | 1               | 0.001                   |
| His <sub>6</sub> -Spc24 | 118                        | His <sub>6</sub> -Spc24 | 183                        | 8                     | 1               | 0.018                   |
| His <sub>6</sub> -Spc24 | 118                        | His <sub>6</sub> -Spc24 | 204                        | 6                     | 1               | 0                       |
| His <sub>6</sub> -Spc24 | 118                        | His <sub>6</sub> -Spc24 | 223                        | 7                     | 2               | 0.001                   |
| His <sub>6</sub> -Spc24 | 118                        | His <sub>6</sub> -Spc24 | 225                        | 12                    | 1               | 0.001                   |
| His <sub>6</sub> -Spc24 | 137                        | His <sub>6</sub> -Spc24 | 143                        | 10                    | 1               | 0.002                   |
| His <sub>6</sub> -Spc24 | 137                        | His <sub>6</sub> -Spc24 | 155                        | 14                    | 1               | 0.001                   |
| His <sub>6</sub> -Spc24 | 137                        | His <sub>6</sub> -Spc24 | 159                        | 5                     | 1               | 0                       |
| His <sub>6</sub> -Spc24 | 137                        | His <sub>6</sub> -Spc24 | 183                        | 7                     | 1               | 0.017                   |
| His <sub>6</sub> -Spc24 | 137                        | His <sub>6</sub> -Spc24 | 204                        | 2                     | 1               | 0.005                   |
| His <sub>6</sub> -Spc24 | 137                        | His <sub>6</sub> -Spc24 | 225                        | 5                     | 1               | 0.003                   |
| His <sub>6</sub> -Spc24 | 139                        | His <sub>6</sub> -Spc24 | 155                        | 10                    | 1               | 0.002                   |
| His <sub>6</sub> -Spc24 | 139                        | His <sub>6</sub> -Spc24 | 159                        | 12                    | 1               | 0                       |
| His <sub>6</sub> -Spc24 | 139                        | His <sub>6</sub> -Spc24 | 181                        | 2                     | 1               | 0.001                   |
| His <sub>6</sub> -Spc24 | 139                        | His <sub>6</sub> -Spc24 | 204                        | 6                     | 1               | 0                       |
| His <sub>6</sub> -Spc24 | 139                        | His <sub>6</sub> -Spc24 | 223                        | 2                     | 1               | 0.001                   |
| His <sub>6</sub> -Spc24 | 139                        | His <sub>6</sub> -Spc24 | 225                        | 5                     | 1               | 0.013                   |
| His <sub>6</sub> -Spc24 | 143                        | His <sub>6</sub> -Spc24 | 159                        | 23                    | 1               | 0                       |
| His <sub>6</sub> -Spc24 | 143                        | His <sub>6</sub> -Spc24 | 181                        | 1                     | 1               | 0.001                   |
| His <sub>6</sub> -Spc24 | 143                        | His <sub>6</sub> -Spc24 | 183                        | 19                    | 1               | 0                       |
| His <sub>6</sub> -Spc24 | 143                        | His <sub>6</sub> -Spc24 | 204                        | 6                     | 1               | 0                       |
| His <sub>6</sub> -Spc24 | 143                        | His <sub>6</sub> -Spc24 | 223                        | 3                     | 1               | 0.002                   |
| His <sub>6</sub> -Spc24 | 143                        | His <sub>6</sub> -Spc24 | 225                        | 2                     | 1               | 0.007                   |
| His <sub>6</sub> -Spc24 | 155                        | His <sub>6</sub> -Spc24 | 159                        | 4                     | 1               | 0.001                   |
| His <sub>6</sub> -Spc24 | 155                        | His <sub>6</sub> -Spc24 | 181                        | 6                     | 1               | 0.001                   |

| Protein 1               | Position 1 <sup>a</sup> | Protein 2               | Position 2 <sup>a</sup> | No. PSMs <sup>b</sup> | No. Peptides | Best Peptide q-value |
|-------------------------|-------------------------|-------------------------|-------------------------|-----------------------|--------------|----------------------|
| His <sub>6</sub> -Spc24 | 155                     | His <sub>6</sub> -Spc24 | 183                     | 6                     | 1            | 0.001                |
| His <sub>6</sub> -Spc24 | 155                     | His <sub>6</sub> -Spc24 | 204                     | 6                     | 1            | 0.002                |
| His <sub>6</sub> -Spc24 | 155                     | His <sub>6</sub> -Spc24 | 223                     | 3                     | 1            | 0.015                |
| His <sub>6</sub> -Spc24 | 155                     | His <sub>6</sub> -Spc24 | 225                     | 8                     | 1            | 0.002                |
| His <sub>6</sub> -Spc24 | 159                     | His <sub>6</sub> -Spc24 | 159                     | 1                     | 1            | 0.004                |
| His <sub>6</sub> -Spc24 | 159                     | His <sub>6</sub> -Spc24 | 183                     | 19                    | 1            | 0                    |
| His <sub>6</sub> -Spc24 | 159                     | His <sub>6</sub> -Spc24 | 204                     | 7                     | 1            | 0                    |
| His <sub>6</sub> -Spc24 | 159                     | His <sub>6</sub> -Spc24 | 223                     | 1                     | 1            | 0                    |
| His <sub>6</sub> -Spc24 | 159                     | His <sub>6</sub> -Spc24 | 225                     | 8                     | 1            | 0                    |
| His <sub>6</sub> -Spc24 | 181                     | His <sub>6</sub> -Spc24 | 204                     | 5                     | 1            | 0                    |
| His <sub>6</sub> -Spc24 | 181                     | His <sub>6</sub> -Spc24 | 223                     | 1                     | 1            | 0.001                |
| His <sub>6</sub> -Spc24 | 181                     | His <sub>6</sub> -Spc24 | 225                     | 4                     | 1            | 0                    |
| His <sub>6</sub> -Spc24 | 183                     | His <sub>6</sub> -Spc24 | 204                     | 23                    | 1            | 0                    |
| His <sub>6</sub> -Spc24 | 183                     | His <sub>6</sub> -Spc24 | 223                     | 4                     | 2            | 0.002                |
| His <sub>6</sub> -Spc24 | 183                     | His <sub>6</sub> -Spc24 | 225                     | 15                    | 1            | 0.007                |
| His <sub>6</sub> -Spc24 | 204                     | His <sub>6</sub> -Spc24 | 225                     | 11                    | 1            | 0                    |
| His <sub>6</sub> -Spc24 | 223                     | His <sub>6</sub> -Spc24 | 225                     | 1                     | 1            | 0.002                |
| His <sub>6</sub> -Spc24 | 225                     | His <sub>6</sub> -Spc24 | 225                     | 6                     | 1            | 0.003                |
| Spc25                   | 2                       | Spc25                   | 19                      | 4                     | 1            | 0                    |
| Spc25                   | 2                       | Ndc80                   | 641                     | 37                    | 1            | 0                    |
| Spc25                   | 2                       | His <sub>6</sub> -Spc24 | 2                       | 15                    | 1            | 0                    |
| Spc25                   | 19                      | Ndc80                   | 655                     | 36                    | 3            | 0                    |
| Spc25                   | 19                      | His <sub>6</sub> -Spc24 | 2                       | 23                    | 1            | 0.001                |
| Spc25                   | 118                     | Spc25                   | 118                     | 5                     | 1            | 0                    |
| Spc25                   | 118                     | Ndc80                   | 48                      | 4                     | 1            | 0                    |
| Spc25                   | 118                     | Ndc80                   | 89                      | 4                     | 1            | 0                    |
| Spc25                   | 118                     | His <sub>6</sub> -Spc24 | 110                     | 3                     | 1            | 0                    |
| Spc25                   | 118                     | His <sub>6</sub> -Spc24 | 118                     | 3                     | 1            | 0.002                |
| Spc25                   | 118                     | His <sub>6</sub> -Spc24 | 137                     | 15                    | 1            | 0                    |
| Spc25                   | 118                     | His <sub>6</sub> -Spc24 | 139                     | 8                     | 1            | 0.004                |
| Spc25                   | 118                     | His <sub>6</sub> -Spc24 | 143                     | 25                    | 1            | 0                    |
| Spc25                   | 118                     | His <sub>6</sub> -Spc24 | 155                     | 17                    | 1            | 0.001                |
| Spc25                   | 118                     | His <sub>6</sub> -Spc24 | 159                     | 19                    | 1            | 0                    |
| Spc25                   | 118                     | His <sub>6</sub> -Spc24 | 181                     | 1                     | 1            | 0.002                |
| Spc25                   | 118                     | His <sub>6</sub> -Spc24 | 183                     | 10                    | 1            | 0.004                |
| Spc25                   | 118                     | His <sub>6</sub> -Spc24 | 204                     | 13                    | 1            | 0                    |
| Spc25                   | 118                     | His <sub>6</sub> -Spc24 | 223                     | 4                     | 2            | 0.001                |
| Spc25                   | 118                     | His <sub>6</sub> -Spc24 | 225                     | 8                     | 1            | 0                    |

<sup>a</sup>Wild-type sequence of Spc24 starts at residue 21 due to presence of His<sub>6</sub> tag

<sup>b</sup>PSM, peptide spectrum match
