# Supplementary material
Source: PubMed Central journal article supplement (PMC4256767)
Supplement: 6b0c95b5d32115fb9140e0182fb66851_genetics.114.167775-4.pdf [file 6b0c95b5d32115fb9140e0182fb66851_genetics.114.167775-4.pdf]

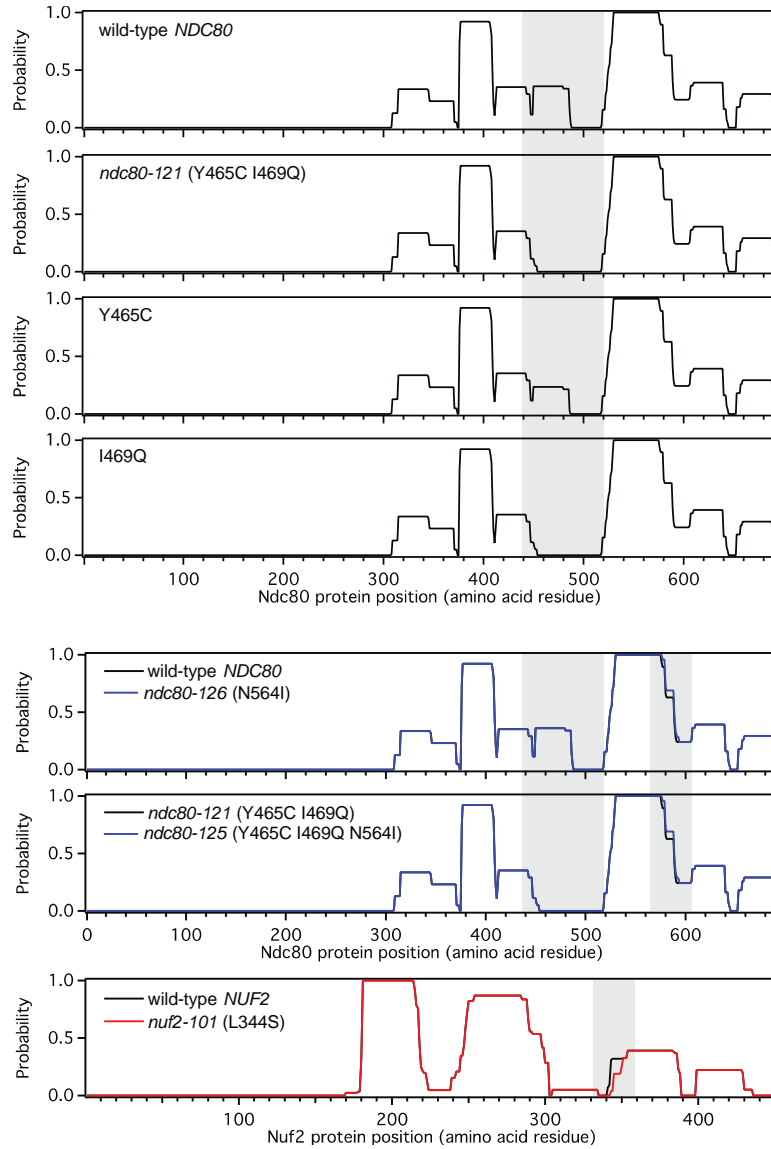

**Figure S3** The effects of mutations in Ndc80 and Nuf2 on predicted coiled-coil formation. The probabilities of coiled-coil formation, as predicted by Paircoil2 (McDONNELL *et al.* 2006), for Ndc80 or Nuf2 containing the indicated mutations. Where genotypes are shown (in italics), the mutations in the translated protein sequences are shown in brackets. Areas of interest are highlighted in grey boxes.
