# Supplementary material
Source: PubMed Central journal article supplement (PMC4256767)
Supplement: 20ab6255e27635a915074d8226ac27cb_genetics.114.167775-6.pdf [file 20ab6255e27635a915074d8226ac27cb_genetics.114.167775-6.pdf]

**Table S3 Immunoprecipitation of Ndc80 complex from wild-type and *ndc80-121* cells**

| Hit Protein | Wild-type <sup>a</sup> |                     |               | <i>ndc80-121</i> <sup>a</sup> |                     |               |
|-------------|------------------------|---------------------|---------------|-------------------------------|---------------------|---------------|
|             | Sequence coverage      | Spectrum count (SC) | Normalized SC | Sequence coverage             | Spectrum count (SC) | Normalized SC |
| Ndc80       | 54%                    | 242                 | 2.18          | 75%                           | 523                 | 1.10          |
| Spc24       | 85%                    | 268                 | 2.41          | 81%                           | 394                 | 0.83          |
| Nuf2-TAP    | 48%                    | 111                 | 1             | 57%                           | 475                 | 1             |
| Spc25       | 50%                    | 92                  | 0.83          | 55%                           | 284                 | 0.60          |

<sup>a</sup>Asynchronous cultures were shifted to 37°C for 100 min. Immunoprecipitated proteins, from a Nuf2-TAP pull-down, were identified by mass spectrometry.
