# Supplementary material
Source: PubMed Central journal article supplement (PMC4256767)
Supplement: 29fcab7f5ad3b7db8fbe1932cb7860ed_genetics.114.167775-9.pdf [file 29fcab7f5ad3b7db8fbe1932cb7860ed_genetics.114.167775-9.pdf]

**Table S5 Recombinant Ndc80 complex loop-links**

| Protein | Position 1 <sup>a</sup> | Position 2 <sup>a</sup> | No. PSMs <sup>b</sup> | No. Peptides | Best Peptide <i>q</i> -value |
|---------|-------------------------|-------------------------|-----------------------|--------------|------------------------------|
| Ndc80   | 67                      | 69                      | 19                    | 1            | 0                            |
| Ndc80   | 137                     | 138                     | 41                    | 4            | 0                            |
| Ndc80   | 137                     | 140                     | 8                     | 2            | 0                            |
| Ndc80   | 138                     | 140                     | 18                    | 2            | 0                            |
| Ndc80   | 152                     | 155                     | 25                    | 2            | 0                            |
| Ndc80   | 332                     | 338                     | 6                     | 1            | 0                            |
| Ndc80   | 338                     | 342                     | 20                    | 3            | 0                            |
| Ndc80   | 342                     | 344                     | 7                     | 1            | 0.002                        |
| Ndc80   | 349                     | 351                     | 3                     | 2            | 0.002                        |
| Ndc80   | 351                     | 354                     | 37                    | 6            | 0                            |
| Ndc80   | 354                     | 359                     | 14                    | 2            | 0                            |
| Ndc80   | 359                     | 368                     | 4                     | 2            | 0.002                        |
| Ndc80   | 359                     | 370                     | 8                     | 2            | 0.002                        |
| Ndc80   | 368                     | 370                     | 2                     | 1            | 0                            |
| Ndc80   | 370                     | 377                     | 8                     | 1            | 0.002                        |
| Ndc80   | 377                     | 380                     | 32                    | 1            | 0.001                        |
| Ndc80   | 380                     | 382                     | 2                     | 1            | 0.001                        |
| Ndc80   | 382                     | 388                     | 7                     | 1            | 0                            |
| Ndc80   | 382                     | 393                     | 1                     | 1            | 0.002                        |
| Ndc80   | 388                     | 393                     | 1                     | 1            | 0.001                        |
| Ndc80   | 393                     | 404                     | 28                    | 3            | 0                            |
| Ndc80   | 404                     | 408                     | 20                    | 1            | 0                            |
| Ndc80   | 408                     | 409                     | 24                    | 1            | 0                            |
| Ndc80   | 432                     | 439                     | 1                     | 1            | 0.001                        |
| Ndc80   | 439                     | 445                     | 14                    | 2            | 0                            |
| Ndc80   | 445                     | 448                     | 15                    | 3            | 0                            |
| Ndc80   | 448                     | 456                     | 7                     | 1            | 0                            |
| Ndc80   | 513                     | 522                     | 8                     | 1            | 0                            |
| Ndc80   | 513                     | 523                     | 9                     | 1            | 0                            |
| Ndc80   | 522                     | 523                     | 14                    | 3            | 0                            |
| Ndc80   | 522                     | 527                     | 1                     | 1            | 0.001                        |
| Ndc80   | 523                     | 527                     | 20                    | 1            | 0                            |
| Ndc80   | 537                     | 541                     | 5                     | 1            | 0.001                        |
| Ndc80   | 537                     | 548                     | 1                     | 1            | 0.023                        |
| Ndc80   | 541                     | 548                     | 3                     | 2            | 0.001                        |
| Ndc80   | 548                     | 551                     | 26                    | 4            | 0                            |
| Ndc80   | 548                     | 554                     | 2                     | 2            | 0.001                        |
| Ndc80   | 551                     | 554                     | 60                    | 4            | 0                            |
| Ndc80   | 554                     | 560                     | 6                     | 1            | 0                            |
| Ndc80   | 560                     | 566                     | 9                     | 3            | 0                            |
| Ndc80   | 566                     | 577                     | 4                     | 1            | 0.002                        |
| Ndc80   | 598                     | 601                     | 18                    | 2            | 0                            |
| Ndc80   | 601                     | 602                     | 12                    | 2            | 0                            |
| Ndc80   | 602                     | 611                     | 1                     | 1            | 0.002                        |
| Ndc80   | 602                     | 613                     | 2                     | 2            | 0.002                        |
| Ndc80   | 611                     | 613                     | 12                    | 3            | 0                            |
| Ndc80   | 638                     | 641                     | 60                    | 1            | 0                            |

| Protein                 | Position 1 <sup>a</sup> | Position 2 <sup>a</sup> | No. PSMs <sup>b</sup> | No. Peptides | Best Peptide q-value |
|-------------------------|-------------------------|-------------------------|-----------------------|--------------|----------------------|
| Nuf2                    | 187                     | 193                     | 2                     | 1            | 0.005                |
| Nuf2                    | 193                     | 200                     | 30                    | 1            | 0                    |
| Nuf2                    | 200                     | 201                     | 62                    | 3            | 0                    |
| Nuf2                    | 200                     | 204                     | 1                     | 1            | 0.002                |
| Nuf2                    | 201                     | 204                     | 23                    | 1            | 0                    |
| Nuf2                    | 217                     | 220                     | 97                    | 1            | 0                    |
| Nuf2                    | 220                     | 225                     | 3                     | 1            | 0                    |
| Nuf2                    | 243                     | 246                     | 76                    | 3            | 0                    |
| Nuf2                    | 270                     | 271                     | 7                     | 1            | 0                    |
| Nuf2                    | 322                     | 329                     | 52                    | 2            | 0                    |
| Nuf2                    | 356                     | 360                     | 48                    | 2            | 0                    |
| Nuf2                    | 360                     | 366                     | 1                     | 1            | 0.001                |
| Nuf2                    | 375                     | 382                     | 24                    | 1            | 0                    |
| Nuf2                    | 382                     | 388                     | 12                    | 2            | 0                    |
| Nuf2                    | 382                     | 390                     | 13                    | 2            | 0                    |
| Nuf2                    | 382                     | 393                     | 3                     | 1            | 0.001                |
| Nuf2                    | 388                     | 390                     | 112                   | 3            | 0                    |
| Nuf2                    | 388                     | 393                     | 18                    | 2            | 0                    |
| Nuf2                    | 390                     | 393                     | 96                    | 2            | 0                    |
| Nuf2                    | 406                     | 409                     | 39                    | 2            | 0                    |
| Nuf2                    | 409                     | 415                     | 1                     | 1            | 0.003                |
| Nuf2                    | 415                     | 419                     | 39                    | 2            | 0                    |
| Nuf2                    | 419                     | 426                     | 15                    | 1            | 0                    |
| His <sub>6</sub> -Spc24 | 71                      | 75                      | 26                    | 2            | 0                    |
| His <sub>6</sub> -Spc24 | 75                      | 81                      | 3                     | 2            | 0.002                |
| His <sub>6</sub> -Spc24 | 75                      | 82                      | 2                     | 1            | 0.004                |
| His <sub>6</sub> -Spc24 | 81                      | 82                      | 15                    | 2            | 0                    |
| His <sub>6</sub> -Spc24 | 92                      | 110                     | 10                    | 2            | 0.001                |
| His <sub>6</sub> -Spc24 | 110                     | 115                     | 20                    | 2            | 0                    |
| His <sub>6</sub> -Spc24 | 110                     | 118                     | 21                    | 1            | 0                    |
| His <sub>6</sub> -Spc24 | 115                     | 118                     | 30                    | 2            | 0                    |
| His <sub>6</sub> -Spc24 | 137                     | 139                     | 13                    | 2            | 0                    |
| His <sub>6</sub> -Spc24 | 137                     | 143                     | 8                     | 1            | 0                    |
| His <sub>6</sub> -Spc24 | 139                     | 143                     | 33                    | 1            | 0                    |
| His <sub>6</sub> -Spc24 | 155                     | 157                     | 22                    | 3            | 0                    |
| His <sub>6</sub> -Spc24 | 157                     | 159                     | 33                    | 1            | 0                    |
| His <sub>6</sub> -Spc24 | 181                     | 183                     | 18                    | 1            | 0                    |
| His <sub>6</sub> -Spc24 | 223                     | 225                     | 17                    | 2            | 0                    |

<sup>a</sup>Wild-type sequence of Spc24 starts at residue 21 due to presence of His<sub>6</sub> tag

<sup>b</sup>PSM, peptide spectrum match
