# Supplementary material
Source: PubMed Central journal article supplement (PMC4256767)
Supplement: 341ddd6c7bed670a6cc4636cb27d3d86_genetics.114.167775-5.pdf [file 341ddd6c7bed670a6cc4636cb27d3d86_genetics.114.167775-5.pdf]

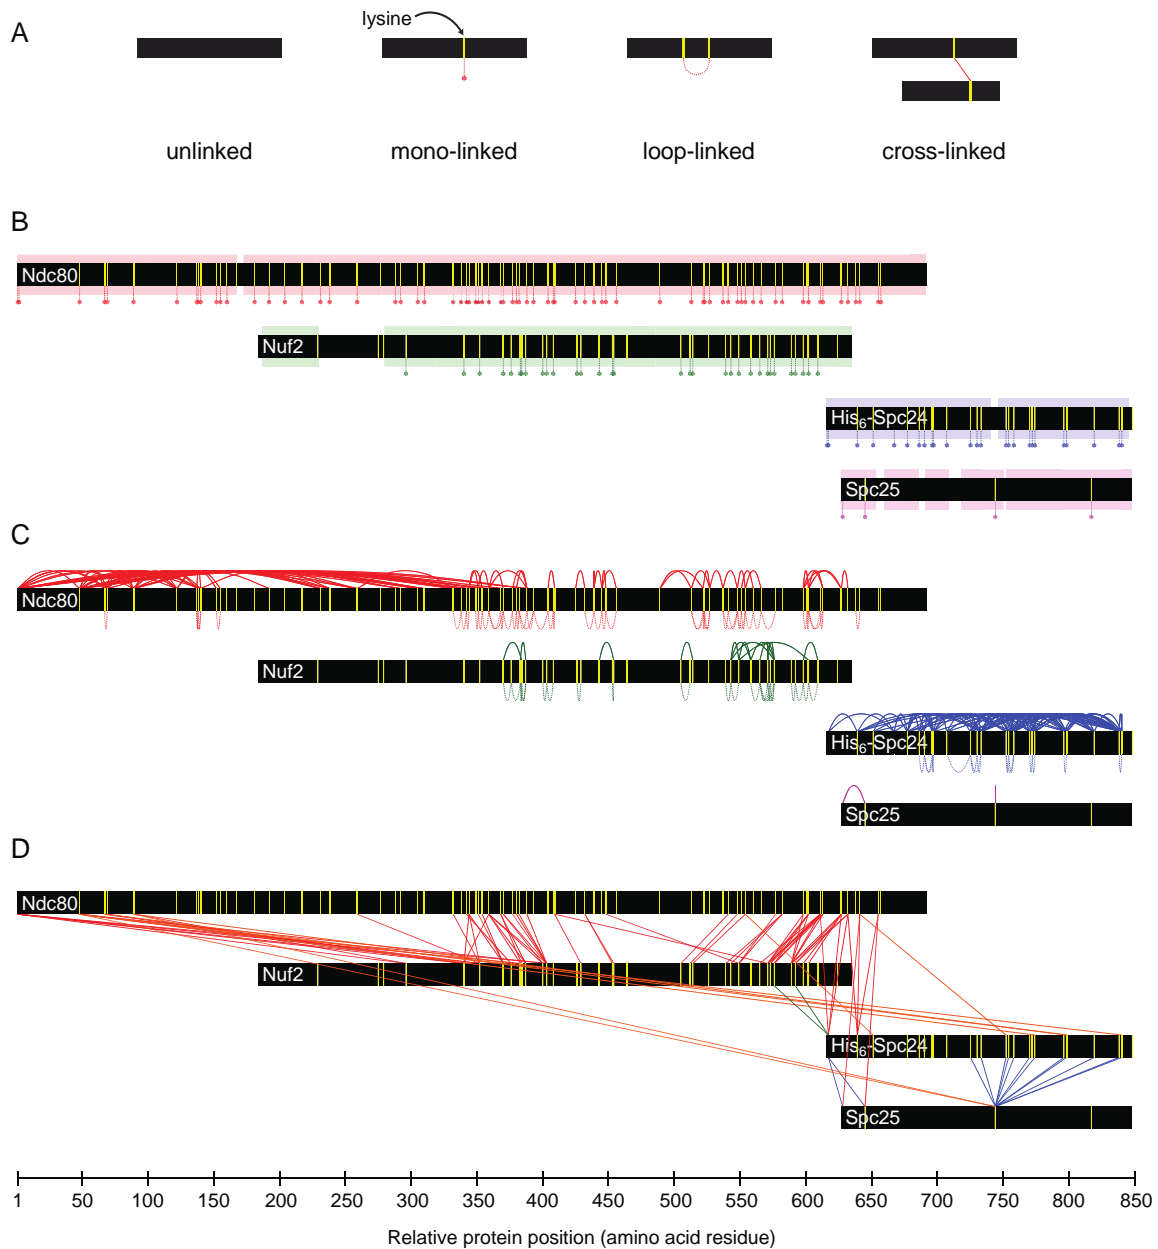

**Figure S2** Summary of cross-linking study on wild-type recombinant *S. cerevisiae* Ndc80 complex. (A) After cross-linking and trypsin digestion, four possible peptides were identified by mass spectrometry. (B-D) Diagram representation of cross-linking results for Ndc80, Nuf2, His<sub>6</sub>-Spc24, and Spc25 (black bars). (B) Peptide sequence coverage (colored boxes) and mono-links (dotted vertical lines and circles). (C) Loop-links (dotted lines) and self cross-links (solid lines, cross-links between two peptides from the same protein). (D) Cross-links between different proteins (solid line). Vertical yellow lines denote positions of lysines. Full lists of cross-linking results are shown in Tables S4 and S5.
