# Supplementary material
Source: PubMed Central journal article supplement (PMC4256767)
Supplement: b9cb881d9a709e5b29335e1b48bb058d_genetics.114.167775-8.pdf [file b9cb881d9a709e5b29335e1b48bb058d_genetics.114.167775-8.pdf]

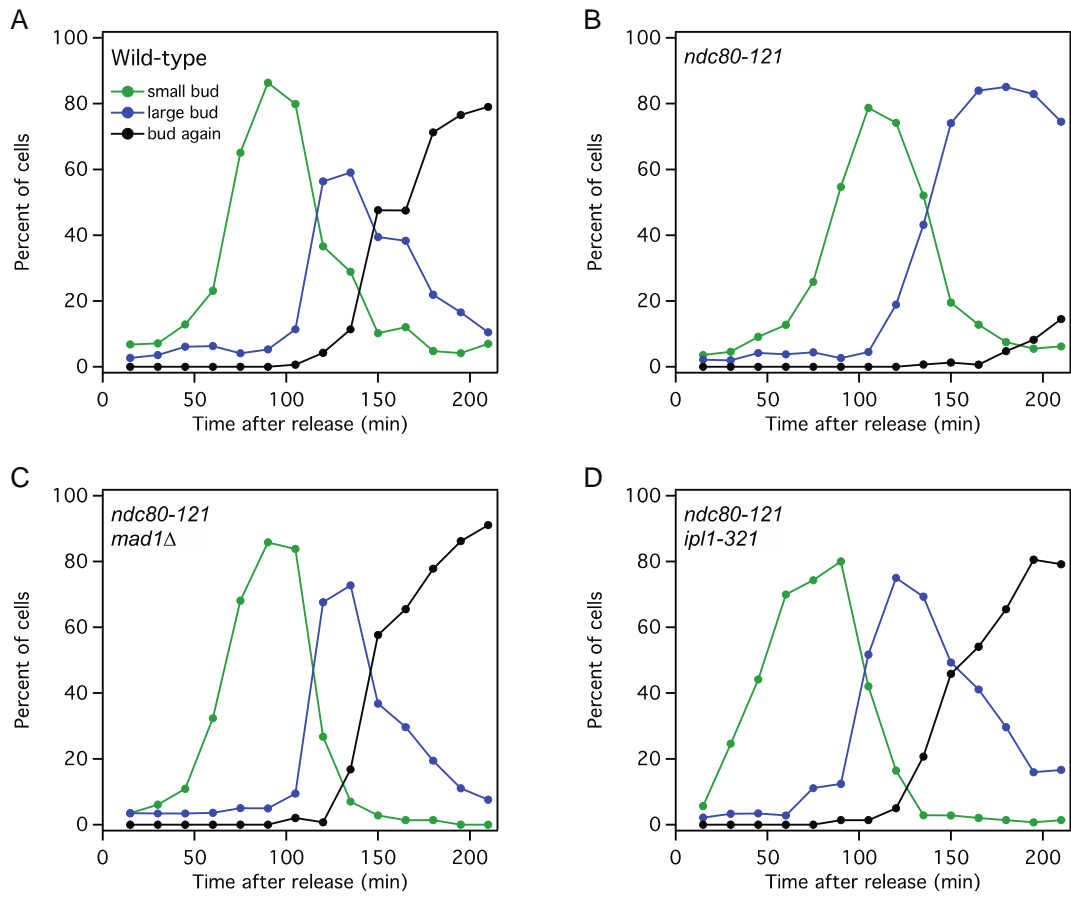

**Figure S1** The mitotic arrest of *ndc80-121* cells is dependent on Ipl1 activity and the spindle checkpoint. Budding indices for (A) wild-type, (B) *ndc80-121*, (C) *ipl1-321*, and (D) *ndc80-121 ip11-321* cells after synchronization at G1 and release into 37°C medium. At 37°C, large-budded *ndc80-121* cells exhibit broken spindles and fail to undergo anaphase (Figure 2A and B).
