# Supplementary material
Source: PubMed Central journal article supplement (PMC4256767)
Supplement: d781157e67a20143e64fe6cf898c2b44_genetics.114.167775-7.pdf [file d781157e67a20143e64fe6cf898c2b44_genetics.114.167775-7.pdf]

**Table S2 Temperature-sensitive mutants in a lethal insertion cluster identified by linker-scanning mutagenesis**

| Insertion (first mutation)<br>or Mutation | Sequence <sup>a</sup>          | Growth |      |      |
|-------------------------------------------|--------------------------------|--------|------|------|
|                                           |                                | 25°C   | 30°C | 37°C |
| CGRRQ (Y465C)                             | TLRQ <b>CGRRQ</b> YDSS         | ++     | -    | -    |
| CGRKY (D466C)                             | LRQY <b>CGRKY</b> DSSI         | +++    | +    | -    |
| CGRND (S467C)                             | RQYD <b>CGRND</b> SSIQ         | +++    | +    | -    |
| CGRNS (S468C)                             | QYD <b>SCGRNS</b> SIQN         | +++    | ++   | -    |
| MRPQS (I469M)                             | YDSS <b>MRPQS</b> IQNL         | +++    | +++  | -    |
| Wild-type                                 | TLRQYDSSIQNL                   | +++    | +++  | +++  |
| Y465C                                     | TLRQ <b>CD</b> SSIQNL          | +++    | +++  | +++  |
| I469Q                                     | TLRQYDSS <b>QQ</b> NL          | +++    | +++  | +++  |
| Y465C I469Q <sup>b</sup>                  | TLRQ <b>CD</b> SS <b>QQ</b> NL | +++    | +++  | -    |
| S467A S468A                               | TLRQYD <b>AA</b> IQNL          | +++    | +++  | +++  |
| S467D S468D                               | TLRQYD <b>DD</b> IQNL          | +++    | +++  | +++  |
| D466G                                     | TLRQY <b>G</b> SSIQNL          | +++    | +++  | +++  |

<sup>a</sup>Insertions and mutations are in bold text<sup>b</sup>*ndc80-121* allele
