# Supplementary material
Source: PubMed Central journal article supplement (PMC4256767)
Supplement: ff575f9b377c8d7197315b53214ad743_genetics.114.167775-1.pdf [file ff575f9b377c8d7197315b53214ad743_genetics.114.167775-1.pdf]

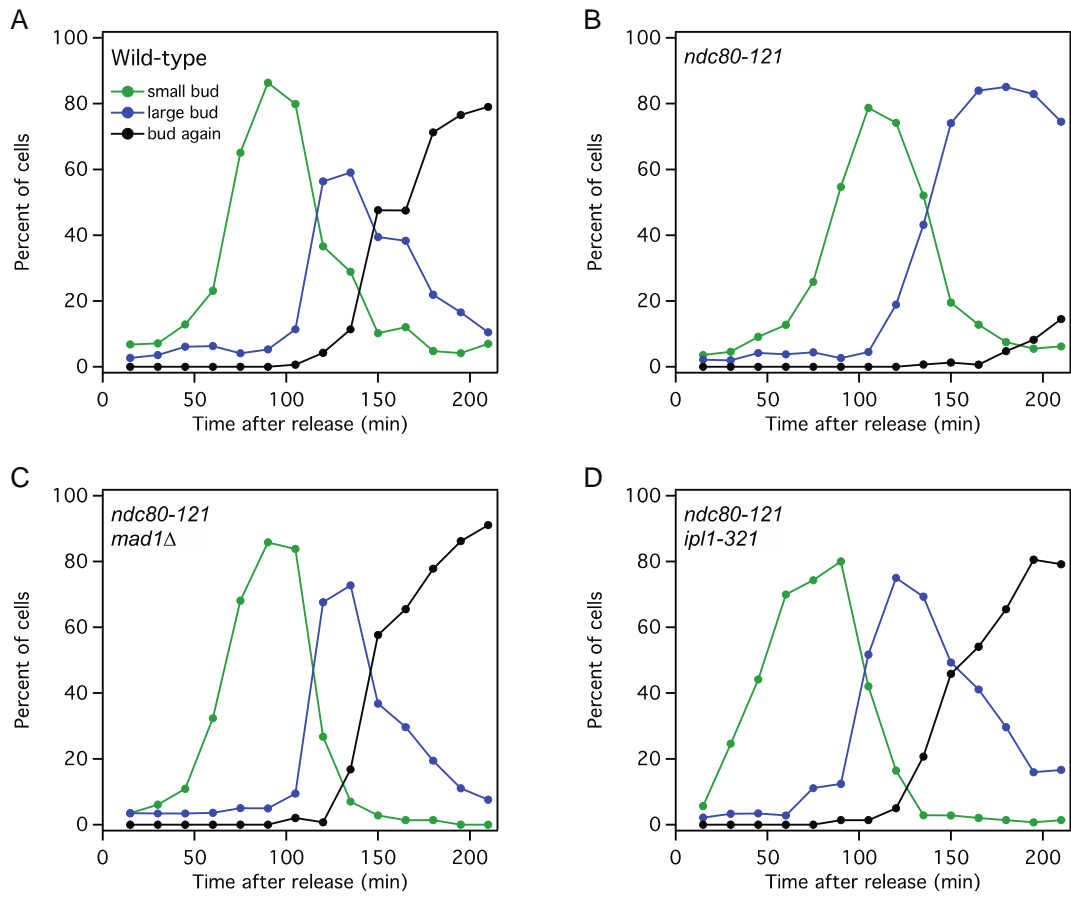

**Figure S1** The mitotic arrest of *ndc80-121* cells is dependent on Ipl1 activity and the spindle checkpoint. Budding indices for (A) wild-type, (B) *ndc80-121*, (C) *ipl1-321*, and (D) *ndc80-121 ip1-321* cells after synchronization at G1 and release into 37°C medium. At 37°C, large-budded *ndc80-121* cells exhibit broken spindles and fail to undergo anaphase (Figure 2A and B).

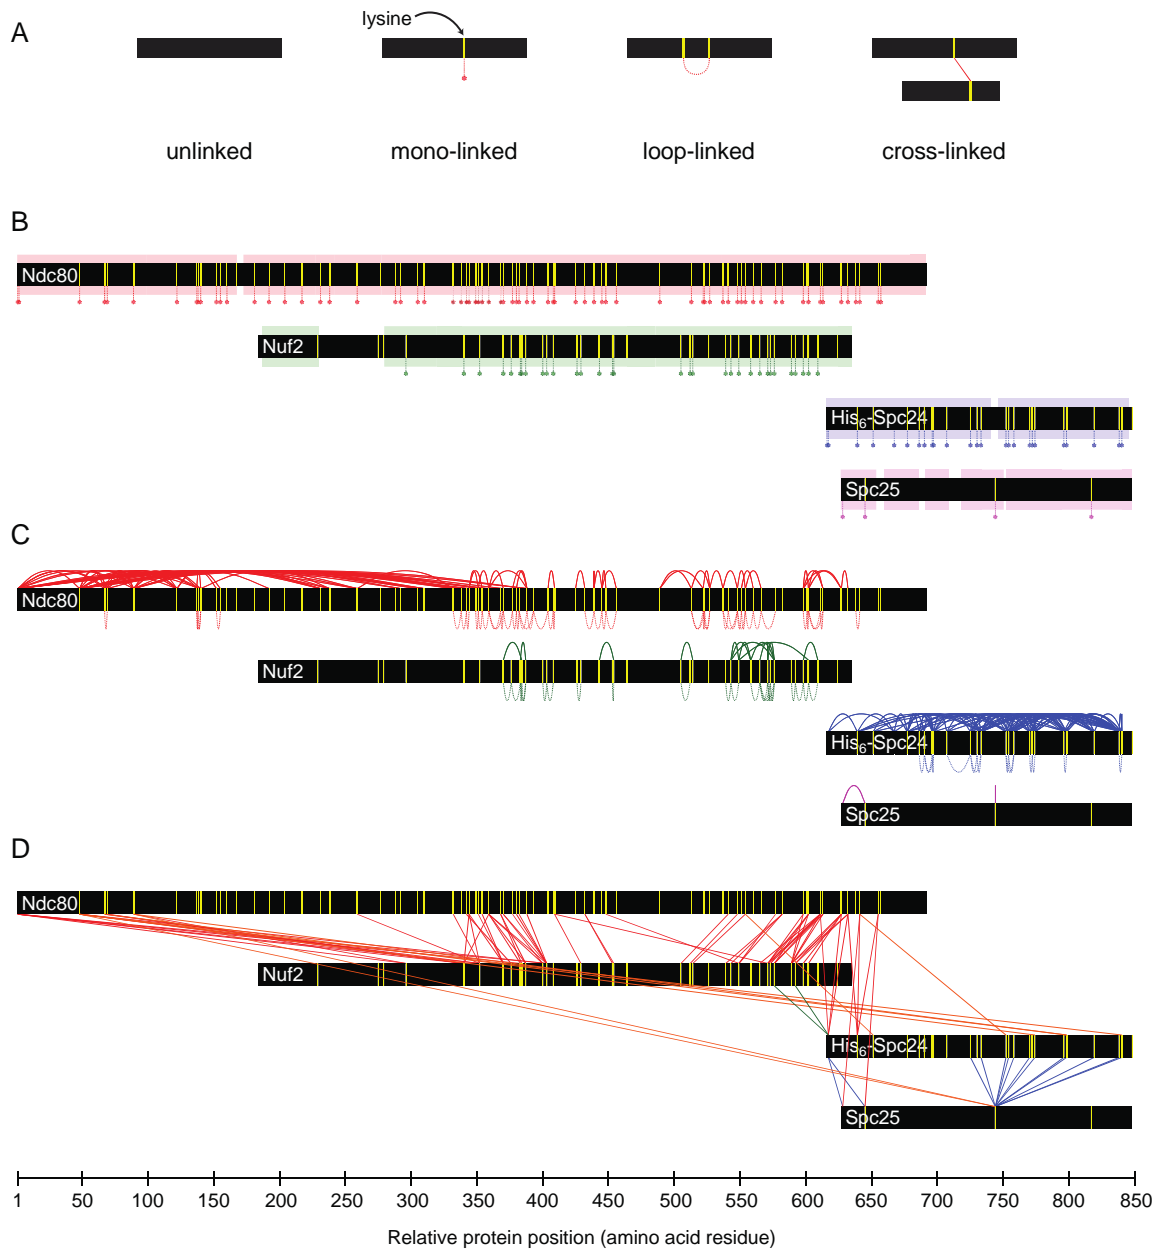

**Figure S2** Summary of cross-linking study on wild-type recombinant *S. cerevisiae* Ndc80 complex. (A) After cross-linking and trypsin digestion, four possible peptides were identified by mass spectrometry. (B-D) Diagram representation of cross-linking results for Ndc80, Nuf2, His<sub>6</sub>-Spc24, and Spc25 (black bars). (B) Peptide sequence coverage (colored boxes) and mono-links (dotted vertical lines and circles). (C) Loop-links (dotted lines) and self cross-links (solid lines, cross-links between two peptides from the same protein). (D) Cross-links between different proteins (solid line). Vertical yellow lines denote positions of lysines. Full lists of cross-linking results are shown in Tables S4 and S5.

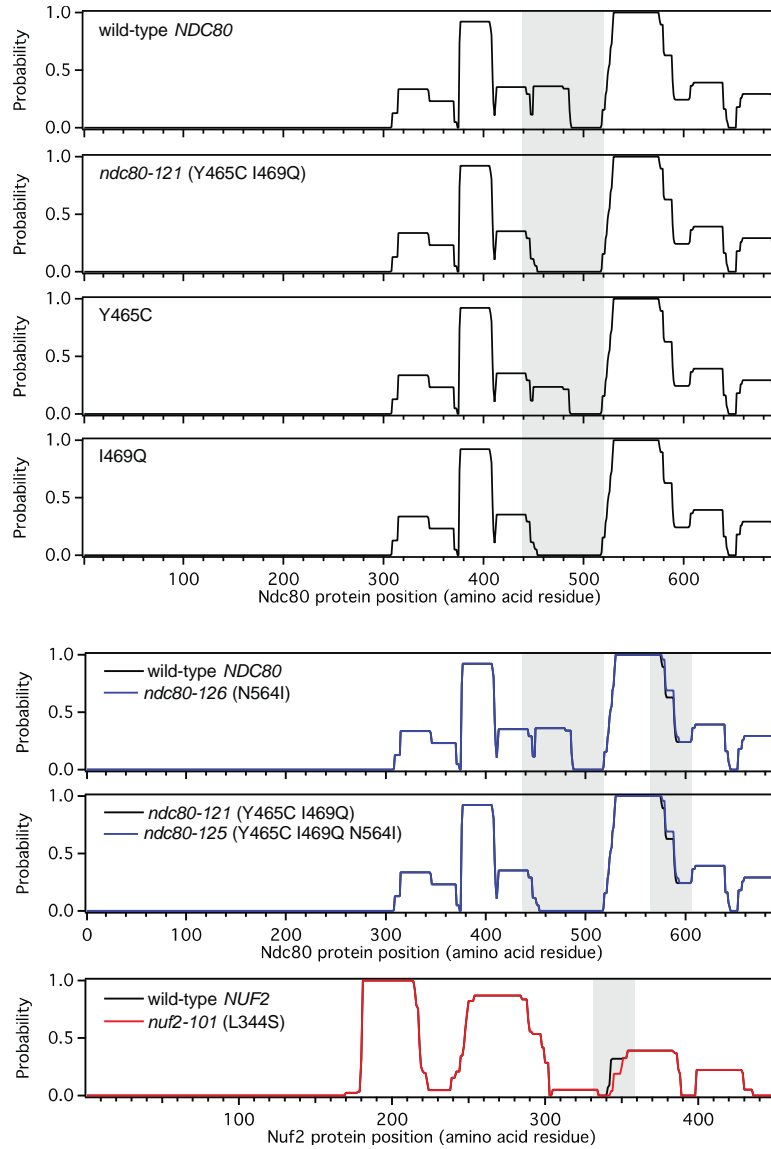

**Figure S3** The effects of mutations in Ndc80 and Nuf2 on predicted coiled-coil formation. The probabilities of coiled-coil formation, as predicted by Paircoil2 (McDONNELL *et al.* 2006), for Ndc80 or Nuf2 containing the indicated mutations. Where genotypes are shown (in italics), the mutations in the translated protein sequences are shown in brackets. Areas of interest are highlighted in grey boxes.

**Table S1 Yeast strains used in this study<sup>a</sup>**

| Strain     | Genotype                                                                                                                                                  | Reference                      |
|------------|-----------------------------------------------------------------------------------------------------------------------------------------------------------|--------------------------------|
| W303       | <i>ade2-1oc can1-100 his3-11,15 leu2-3,112 trp1-1 ura3-1</i>                                                                                              |                                |
| CRY1       | MATa                                                                                                                                                      | GEISER <i>et al.</i> (1993)    |
| JTY14      | MATa <i>ade3Δ-100 lys2Δ::HIS3 ndc80(Y465C)</i>                                                                                                            | This study                     |
| JTY23      | MATa <i>ade3Δ-100 lys2Δ::HIS3 ndc80(I469Q)</i>                                                                                                            | This study                     |
| JTY8       | MATa <i>ade3Δ-100 lys2Δ::HIS3 ndc80-121</i>                                                                                                               | This study                     |
| JTY13      | MATa <i>ade3Δ-100 lys2Δ::HIS3 ndc80(S467A S468A)</i>                                                                                                      | This study                     |
| JTY17      | MATa <i>ade3Δ-100 lys2Δ::HIS3 ndc80(S467D S468D)</i>                                                                                                      | This study                     |
| JTY18      | MATa <i>ade3Δ-100 lys2Δ::HIS3 ndc80(D466G)</i>                                                                                                            | This study                     |
| JTY30-4A   | MATa <i>ade3Δ-100 NUF2-TAP::KanMX NDC80</i>                                                                                                               | This study                     |
| JTY30-1A   | MATa <i>ade3Δ-100 NUF2-TAP::KanMX ndc80-121</i>                                                                                                           | This study                     |
| JTY58-2D   | MATa <i>ade3Δ-100 lys2Δ::HIS3 SPC110-mCherry::hphMX NDC80</i>                                                                                             | This study                     |
| JTY59-8D   | MATa <i>ade3Δ-100 cyh2' lys2Δ::HIS3 SPC110-mCherry::hphMX ndc80-121</i>                                                                                   | This study                     |
| JTY96-14C  | MATa <i>ade3Δ-100 lys2Δ::HIS3 SPC110-mCherry::hphMX ndc80-121 mad1Δ::URA3</i>                                                                             | This study                     |
| JTY98-4B   | MATa <i>ade3Δ-100 SPC110-mCherry::hphMX ndc80-121 ipl1-321</i>                                                                                            | This study                     |
| JTY9-4A    | MATa <i>ade3Δ-100 URA3::TUB1-GFP SPC110-mCherry::hphMX NDC80</i>                                                                                          | This study                     |
| JTY9-10D   | MATa <i>ade3Δ-100 lys2Δ::HIS3 URA3::TUB1-GFP SPC110-mCherry::hphMX ndc80-121</i>                                                                          | This study                     |
| JTY59-12D  | MATa <i>ade3Δ-100 lys2Δ::HIS3 STU2-GFP::NatMX SPC110-mCherry::hphMX NDC80</i>                                                                             | This study                     |
| JTY59-7A   | MATa <i>ade3Δ-100 lys2Δ::HIS3 STU2-GFP::NatMX SPC110-mCherry::hphMX ndc80-121</i>                                                                         | This study                     |
| JTY73-17C  | MATa <i>ade3Δ-100 lys2Δ::HIS3 STU2-GFP::NatMX SPC110-mCherry::hphMX CDC20-AID::KanMX ura3::pADH1-OsTIR1-9myc::URA3 NDC80</i>                              | This study                     |
| JTY73-2A   | MATa <i>ADE3 STU2-GFP::NatMX SPC110-mCherry::hphMX CDC20-AID::KanMX ura3::pADH1-OsTIR1-9myc::URA3 ndc80-121</i>                                           | This study                     |
| MMWY61#2   | MATa <i>ade3Δ-100 pCUP1-GFP12LacI12::HIS3 CEN3-LacO33array::KanMX SPC110-mCherry::hphMX NDC80</i>                                                         | WARGACKI <i>et al.</i> (2010)  |
| JTY65-16B  | MATa <i>ade3Δ-100 pCUP1-GFP12LacI12::HIS3 CEN3-LacO33array::KanMX SPC110-mCherry::hphMX ndc80-121</i>                                                     | This study                     |
| JTY112-58A | MATa <i>ade3Δ-100 lys2Δ::HIS3 pCUP1-GFP12-LacI12::HIS3 CEN3::33LacO::KanMX SPC110-mCherry::hphMX CDC20-AID::KanMX ura3::pADH1-OsTIR1-9myc::URA3 NDC80</i> | This study                     |
| JTY112-20B | MATa <i>ADE3 lys2Δ::HIS3 pCUP1-GFP12-LacI12::HIS3 CEN3::33LacO::KanMX SPC110-mCherry::hphMX CDC20-AID::KanMX ura3::pADH1-OsTIR1-9myc::URA3 ndc80-121</i>  | This study                     |
| JTY11-5A   | MATa <i>ade3Δ-100 NUF2-GFP::HIS3 SPC110-mCherry::hphMX NDC80</i>                                                                                          | This study                     |
| JTY11-16A  | MATa <i>ade3Δ-100 NUF2-GFP::HIS3 SPC110-mCherry::hphMX ndc80-121</i>                                                                                      | This study                     |
| MSY284-8D  | MATa <i>ade3Δ-100 NUF2-GFP::HIS3 SPC110-mCherry::hphMX ipl1-321</i>                                                                                       | Michelle M. Shimogawa          |
| JTY98-13D  | MATa <i>ade3Δ-100 NUF2-GFP::HIS3 SPC110-mCherry::hphMX ndc80-121 ipl1-321</i>                                                                             | This study                     |
| KGY315     | MATa/MATa <i>ADE3/ade3Δ-100 cyh2'/CYH2<sup>s</sup></i>                                                                                                    | GREENLAND <i>et al.</i> (2010) |
| JTY82      | MATa/MATa <i>ade3Δ-100/ade3Δ-100 cyh2'/cyh2' lys2Δ::HIS3/lys2Δ::HIS3 ndc80-121/ndc80-121</i>                                                              | This study                     |
| JTY74      | MATa/MATa <i>ade3Δ-100/ADE3 cyh2'/CYH2<sup>s</sup> lys2Δ::HIS3/LYS2 ndc80-121/NDC80</i>                                                                   | This study                     |
| JTY83      | MATa <i>ade3Δ-100 lys2Δ::HIS3 ndc80-125</i>                                                                                                               | This study                     |
| JTY81      | MATa/MATa <i>ade3Δ-100/ade3Δ-100 cyh2'/cyh2' lys2Δ::HIS3/lys2Δ::HIS3 ndc80-121/ndc80-125</i>                                                              | This study                     |

| Strain    | Genotype                                                                                                                         | Reference  |
|-----------|----------------------------------------------------------------------------------------------------------------------------------|------------|
| JTY102    | MATa/MATα <i>ade3Δ-100/ade3Δ-100 cyh2<sup>r</sup>/cyh2<sup>r</sup> lys2Δ::HIS3/lys2Δ::HIS3 ndc80-125/ndc80-125</i>               | This study |
| JTY79     | MATa/MATα <i>ade3Δ-100/ADE3 cyh2<sup>r</sup>/CYH2<sup>s</sup> lys2Δ::HIS3/LYS2 ndc80-125/NDC80</i>                               | This study |
| JTY114    | MATa <i>ade3Δ-100 cyh2<sup>r</sup> lys2Δ::HIS3 ndc80-126</i>                                                                     | This study |
| JTY116    | MATa/MATα <i>ade3Δ-100/ade3Δ-100 cyh2<sup>r</sup>/cyh2<sup>r</sup> lys2Δ::HIS3/lys2Δ::HIS3 ndc80-126/ndc80-121</i>               | This study |
| JTY84     | MATa <i>ade3Δ-100 lys2Δ::HIS3 ndc80-121 nuf2-101</i>                                                                             | This study |
| JTY86-5C  | MATa <i>ade3Δ-100 cyh2<sup>r</sup> lys2Δ::HIS3 NDC80 nuf2-101</i>                                                                | This study |
| JTY88     | MATa/MATα <i>ade3Δ-100/ade3Δ-100 cyh2<sup>r</sup>/cyh2<sup>r</sup> lys2Δ::HIS3/lys2Δ::HIS3 ndc80-121/ndc80-121 nuf2-101/NUF2</i> | This study |
| JTY101-6B | MATa <i>ade3Δ-100 cyh2<sup>r</sup> lys2Δ::HIS3 ndc80-125 nuf2-101</i>                                                            | This study |
| JTY101    | MATa/MATα <i>ade3Δ-100/ade3Δ-100 cyh2<sup>r</sup>/cyh2<sup>r</sup> lys2Δ::HIS3/lys2Δ::HIS3 ndc80-121/ndc80-125 nuf2-101/NUF2</i> | This study |

<sup>a</sup>All strains have the same markers as W303 except as noted

**Table S2 Temperature-sensitive mutants in a lethal insertion cluster identified by linker-scanning mutagenesis**

| Insertion (first mutation)<br>or Mutation | Sequence <sup>a</sup>          | Growth |      |      |
|-------------------------------------------|--------------------------------|--------|------|------|
|                                           |                                | 25°C   | 30°C | 37°C |
| CGRRQ (Y465C)                             | TLRQ <b>CGRRQ</b> YDSS         | ++     | -    | -    |
| CGRKY (D466C)                             | LRQY <b>CGRKY</b> DSSI         | +++    | +    | -    |
| CGRND (S467C)                             | RQYD <b>CGRND</b> SSIQ         | +++    | +    | -    |
| CGRNS (S468C)                             | QYD <b>SCGRNS</b> SIQN         | +++    | ++   | -    |
| MRPQS (I469M)                             | YDSS <b>MRPQS</b> IQNL         | +++    | +++  | -    |
| Wild-type                                 | TLRQYDSSIQNL                   | +++    | +++  | +++  |
| Y465C                                     | TLRQ <b>CD</b> SSIQNL          | +++    | +++  | +++  |
| I469Q                                     | TLRQYDSS <b>QQ</b> NL          | +++    | +++  | +++  |
| Y465C I469Q <sup>b</sup>                  | TLRQ <b>CD</b> SS <b>QQ</b> NL | +++    | +++  | -    |
| S467A S468A                               | TLRQYD <b>AA</b> IQNL          | +++    | +++  | +++  |
| S467D S468D                               | TLRQYD <b>DD</b> IQNL          | +++    | +++  | +++  |
| D466G                                     | TLRQY <b>G</b> SSIQNL          | +++    | +++  | +++  |

<sup>a</sup>Insertions and mutations are in bold text<sup>b</sup>*ndc80-121* allele

**Table S3 Immunoprecipitation of Ndc80 complex from wild-type and *ndc80-121* cells**

| Hit Protein | Wild-type <sup>a</sup> |                     |               | <i>ndc80-121</i> <sup>a</sup> |                     |               |
|-------------|------------------------|---------------------|---------------|-------------------------------|---------------------|---------------|
|             | Sequence coverage      | Spectrum count (SC) | Normalized SC | Sequence coverage             | Spectrum count (SC) | Normalized SC |
| Ndc80       | 54%                    | 242                 | 2.18          | 75%                           | 523                 | 1.10          |
| Spc24       | 85%                    | 268                 | 2.41          | 81%                           | 394                 | 0.83          |
| Nuf2-TAP    | 48%                    | 111                 | 1             | 57%                           | 475                 | 1             |
| Spc25       | 50%                    | 92                  | 0.83          | 55%                           | 284                 | 0.60          |

<sup>a</sup>Asynchronous cultures were shifted to 37°C for 100 min. Immunoprecipitated proteins, from a Nuf2-TAP pull-down, were identified by mass spectrometry.

**Table S4 Recombinant Ndc80 complex cross-links**

| Protein<br>1 | Position<br>1 <sup>a</sup> | Protein<br>2            | Position<br>2 <sup>a</sup> | No. PSMs <sup>b</sup> | No.<br>Peptides | Best Peptide<br>q-value |
|--------------|----------------------------|-------------------------|----------------------------|-----------------------|-----------------|-------------------------|
| Ndc80        | 1                          | Ndc80                   | 48                         | 62                    | 1               | 0                       |
| Ndc80        | 1                          | Ndc80                   | 67                         | 15                    | 2               | 0                       |
| Ndc80        | 1                          | Ndc80                   | 69                         | 7                     | 1               | 0                       |
| Ndc80        | 1                          | Ndc80                   | 89                         | 21                    | 1               | 0                       |
| Ndc80        | 1                          | Ndc80                   | 122                        | 4                     | 2               | 0                       |
| Ndc80        | 1                          | Ndc80                   | 140                        | 11                    | 1               | 0                       |
| Ndc80        | 1                          | Ndc80                   | 259                        | 4                     | 1               | 0.001                   |
| Ndc80        | 1                          | Ndc80                   | 292                        | 3                     | 1               | 0                       |
| Ndc80        | 1                          | Ndc80                   | 305                        | 32                    | 1               | 0                       |
| Ndc80        | 1                          | Ndc80                   | 310                        | 6                     | 1               | 0                       |
| Ndc80        | 1                          | Ndc80                   | 332                        | 3                     | 1               | 0                       |
| Ndc80        | 1                          | Ndc80                   | 338                        | 27                    | 1               | 0                       |
| Ndc80        | 1                          | Ndc80                   | 342                        | 1                     | 1               | 0.008                   |
| Ndc80        | 1                          | Ndc80                   | 344                        | 14                    | 1               | 0                       |
| Ndc80        | 1                          | Ndc80                   | 354                        | 1                     | 1               | 0.006                   |
| Ndc80        | 1                          | Ndc80                   | 359                        | 24                    | 1               | 0                       |
| Ndc80        | 1                          | Ndc80                   | 370                        | 16                    | 1               | 0                       |
| Ndc80        | 1                          | Ndc80                   | 388                        | 2                     | 1               | 0.001                   |
| Ndc80        | 1                          | Nuf2                    | 113                        | 3                     | 1               | 0.004                   |
| Ndc80        | 1                          | Nuf2                    | 157                        | 19                    | 1               | 0                       |
| Ndc80        | 1                          | Nuf2                    | 169                        | 4                     | 1               | 0                       |
| Ndc80        | 1                          | Nuf2                    | 200                        | 1                     | 1               | 0.013                   |
| Ndc80        | 1                          | Nuf2                    | 220                        | 11                    | 1               | 0                       |
| Ndc80        | 48                         | Ndc80                   | 67                         | 21                    | 2               | 0                       |
| Ndc80        | 48                         | Ndc80                   | 69                         | 3                     | 1               | 0.008                   |
| Ndc80        | 48                         | Ndc80                   | 89                         | 14                    | 1               | 0                       |
| Ndc80        | 48                         | Ndc80                   | 122                        | 2                     | 1               | 0.001                   |
| Ndc80        | 48                         | Ndc80                   | 138                        | 3                     | 1               | 0.004                   |
| Ndc80        | 48                         | Ndc80                   | 140                        | 2                     | 1               | 0                       |
| Ndc80        | 48                         | Ndc80                   | 231                        | 5                     | 1               | 0                       |
| Ndc80        | 48                         | Ndc80                   | 238                        | 2                     | 1               | 0.004                   |
| Ndc80        | 48                         | Ndc80                   | 259                        | 5                     | 1               | 0                       |
| Ndc80        | 48                         | Ndc80                   | 292                        | 2                     | 1               | 0.002                   |
| Ndc80        | 48                         | Ndc80                   | 305                        | 12                    | 1               | 0                       |
| Ndc80        | 48                         | Ndc80                   | 310                        | 1                     | 1               | 0.043                   |
| Ndc80        | 48                         | Ndc80                   | 332                        | 1                     | 1               | 0.005                   |
| Ndc80        | 48                         | Ndc80                   | 338                        | 12                    | 1               | 0                       |
| Ndc80        | 48                         | Ndc80                   | 354                        | 4                     | 1               | 0.001                   |
| Ndc80        | 48                         | Ndc80                   | 388                        | 2                     | 1               | 0.001                   |
| Ndc80        | 48                         | Nuf2                    | 157                        | 12                    | 1               | 0                       |
| Ndc80        | 48                         | Nuf2                    | 169                        | 6                     | 2               | 0                       |
| Ndc80        | 48                         | Nuf2                    | 220                        | 1                     | 1               | 0                       |
| Ndc80        | 48                         | His <sub>6</sub> -Spc24 | 159                        | 1                     | 1               | 0.023                   |
| Ndc80        | 48                         | His <sub>6</sub> -Spc24 | 225                        | 1                     | 1               | 0.006                   |
| Ndc80        | 67                         | Ndc80                   | 89                         | 21                    | 2               | 0                       |
| Ndc80        | 67                         | Ndc80                   | 122                        | 1                     | 1               | 0.037                   |
| Ndc80        | 67                         | Nuf2                    | 157                        | 6                     | 2               | 0                       |



| Protein 1 | Position 1 <sup>a</sup> | Protein 2               | Position 2 <sup>a</sup> | No. PSMs <sup>b</sup> | No. Peptides | Best Peptide q-value |
|-----------|-------------------------|-------------------------|-------------------------|-----------------------|--------------|----------------------|
| Ndc80     | 67                      | His <sub>6</sub> -Spc24 | 183                     | 2                     | 1            | 0.004                |
| Ndc80     | 69                      | Ndc80                   | 89                      | 5                     | 1            | 0                    |
| Ndc80     | 69                      | Ndc80                   | 122                     | 1                     | 1            | 0.002                |
| Ndc80     | 69                      | Ndc80                   | 231                     | 1                     | 1            | 0.036                |
| Ndc80     | 69                      | Nuf2                    | 157                     | 3                     | 1            | 0.001                |
| Ndc80     | 89                      | Ndc80                   | 122                     | 11                    | 2            | 0                    |
| Ndc80     | 89                      | Ndc80                   | 138                     | 8                     | 1            | 0                    |
| Ndc80     | 89                      | Ndc80                   | 140                     | 2                     | 1            | 0                    |
| Ndc80     | 89                      | Ndc80                   | 192                     | 2                     | 1            | 0.001                |
| Ndc80     | 89                      | Ndc80                   | 231                     | 10                    | 2            | 0                    |
| Ndc80     | 89                      | Ndc80                   | 238                     | 1                     | 1            | 0.004                |
| Ndc80     | 89                      | Ndc80                   | 259                     | 1                     | 1            | 0                    |
| Ndc80     | 89                      | Nuf2                    | 113                     | 4                     | 1            | 0                    |
| Ndc80     | 89                      | His <sub>6</sub> -Spc24 | 183                     | 1                     | 1            | 0.003                |
| Ndc80     | 122                     | Ndc80                   | 152                     | 28                    | 4            | 0                    |
| Ndc80     | 122                     | Ndc80                   | 155                     | 40                    | 2            | 0                    |
| Ndc80     | 137                     | Ndc80                   | 140                     | 18                    | 3            | 0                    |
| Ndc80     | 140                     | Ndc80                   | 238                     | 1                     | 1            | 0.003                |
| Ndc80     | 259                     | Ndc80                   | 332                     | 13                    | 1            | 0                    |
| Ndc80     | 259                     | Nuf2                    | 169                     | 38                    | 4            | 0                    |
| Ndc80     | 332                     | Nuf2                    | 169                     | 3                     | 1            | 0                    |
| Ndc80     | 342                     | Nuf2                    | 193                     | 3                     | 1            | 0.003                |
| Ndc80     | 344                     | Ndc80                   | 351                     | 8                     | 1            | 0.012                |
| Ndc80     | 344                     | Ndc80                   | 354                     | 14                    | 1            | 0.001                |
| Ndc80     | 344                     | Nuf2                    | 157                     | 3                     | 1            | 0.002                |
| Ndc80     | 344                     | Nuf2                    | 169                     | 23                    | 4            | 0                    |
| Ndc80     | 344                     | Nuf2                    | 187                     | 1                     | 1            | 0.03                 |
| Ndc80     | 351                     | Ndc80                   | 359                     | 21                    | 2            | 0                    |
| Ndc80     | 351                     | Nuf2                    | 187                     | 62                    | 4            | 0.001                |
| Ndc80     | 354                     | Nuf2                    | 187                     | 52                    | 4            | 0                    |
| Ndc80     | 359                     | Ndc80                   | 370                     | 66                    | 2            | 0                    |
| Ndc80     | 359                     | Ndc80                   | 388                     | 1                     | 1            | 0.004                |
| Ndc80     | 359                     | Nuf2                    | 157                     | 12                    | 1            | 0                    |
| Ndc80     | 359                     | Nuf2                    | 200                     | 20                    | 3            | 0                    |
| Ndc80     | 359                     | Nuf2                    | 204                     | 1                     | 1            | 0                    |
| Ndc80     | 359                     | Nuf2                    | 217                     | 3                     | 1            | 0                    |
| Ndc80     | 359                     | Nuf2                    | 220                     | 7                     | 1            | 0.001                |
| Ndc80     | 368                     | Nuf2                    | 201                     | 2                     | 1            | 0.003                |
| Ndc80     | 368                     | Nuf2                    | 204                     | 40                    | 2            | 0                    |
| Ndc80     | 370                     | Nuf2                    | 217                     | 40                    | 2            | 0.001                |
| Ndc80     | 370                     | Nuf2                    | 220                     | 118                   | 2            | 0                    |
| Ndc80     | 377                     | Ndc80                   | 388                     | 73                    | 3            | 0.001                |
| Ndc80     | 377                     | Nuf2                    | 220                     | 70                    | 1            | 0.001                |
| Ndc80     | 380                     | Ndc80                   | 388                     | 7                     | 1            | 0.003                |
| Ndc80     | 380                     | Nuf2                    | 220                     | 9                     | 1            | 0.002                |
| Ndc80     | 382                     | Nuf2                    | 220                     | 12                    | 1            | 0.001                |
| Ndc80     | 388                     | Nuf2                    | 220                     | 5                     | 1            | 0.002                |
| Ndc80     | 404                     | Ndc80                   | 409                     | 11                    | 1            | 0                    |

| Protein<br>1 | Position<br>1 <sup>a</sup> | Protein<br>2            | Position<br>2 <sup>a</sup> | No. PSMs <sup>b</sup> | No.<br>Peptides | Best Peptide<br>q-value |
|--------------|----------------------------|-------------------------|----------------------------|-----------------------|-----------------|-------------------------|
| Ndc80        | 409                        | Nuf2                    | 246                        | 5                     | 2               | 0                       |
| Ndc80        | 409                        | Nuf2                    | 388                        | 1                     | 1               | 0.012                   |
| Ndc80        | 425                        | Ndc80                   | 432                        | 6                     | 2               | 0.003                   |
| Ndc80        | 432                        | Nuf2                    | 270                        | 8                     | 1               | 0.002                   |
| Ndc80        | 432                        | Nuf2                    | 271                        | 1                     | 1               | 0.009                   |
| Ndc80        | 439                        | Ndc80                   | 439                        | 1                     | 1               | 0.011                   |
| Ndc80        | 439                        | Ndc80                   | 445                        | 2                     | 1               | 0.023                   |
| Ndc80        | 445                        | Ndc80                   | 448                        | 51                    | 3               | 0                       |
| Ndc80        | 445                        | Ndc80                   | 456                        | 1                     | 1               | 0.032                   |
| Ndc80        | 448                        | Nuf2                    | 366                        | 2                     | 1               | 0.01                    |
| Ndc80        | 489                        | Ndc80                   | 513                        | 6                     | 2               | 0                       |
| Ndc80        | 489                        | Ndc80                   | 522                        | 1                     | 1               | 0.003                   |
| Ndc80        | 513                        | Ndc80                   | 527                        | 8                     | 2               | 0                       |
| Ndc80        | 522                        | Ndc80                   | 527                        | 6                     | 1               | 0.001                   |
| Ndc80        | 527                        | Ndc80                   | 537                        | 1                     | 1               | 0.005                   |
| Ndc80        | 537                        | Ndc80                   | 548                        | 14                    | 1               | 0.008                   |
| Ndc80        | 541                        | Nuf2                    | 322                        | 8                     | 2               | 0                       |
| Ndc80        | 548                        | Ndc80                   | 554                        | 34                    | 2               | 0                       |
| Ndc80        | 548                        | Nuf2                    | 329                        | 1                     | 1               | 0.004                   |
| Ndc80        | 551                        | Ndc80                   | 560                        | 2                     | 1               | 0.009                   |
| Ndc80        | 554                        | Ndc80                   | 566                        | 1                     | 1               | 0.004                   |
| Ndc80        | 554                        | Nuf2                    | 331                        | 205                   | 1               | 0                       |
| Ndc80        | 554                        | His <sub>6</sub> -Spc24 | 36                         | 1                     | 1               | 0.022                   |
| Ndc80        | 577                        | Nuf2                    | 366                        | 23                    | 4               | 0                       |
| Ndc80        | 582                        | Nuf2                    | 356                        | 5                     | 1               | 0.001                   |
| Ndc80        | 582                        | Nuf2                    | 360                        | 33                    | 3               | 0                       |
| Ndc80        | 582                        | Nuf2                    | 366                        | 6                     | 1               | 0.001                   |
| Ndc80        | 598                        | Ndc80                   | 602                        | 15                    | 1               | 0.001                   |
| Ndc80        | 598                        | Ndc80                   | 613                        | 1                     | 1               | 0.02                    |
| Ndc80        | 598                        | Ndc80                   | 627                        | 2                     | 1               | 0.013                   |
| Ndc80        | 598                        | Nuf2                    | 388                        | 6                     | 1               | 0                       |
| Ndc80        | 598                        | Nuf2                    | 406                        | 2                     | 1               | 0.001                   |
| Ndc80        | 602                        | Ndc80                   | 613                        | 56                    | 3               | 0                       |
| Ndc80        | 602                        | Ndc80                   | 627                        | 2                     | 1               | 0.001                   |
| Ndc80        | 602                        | Nuf2                    | 388                        | 20                    | 1               | 0.001                   |
| Ndc80        | 602                        | Nuf2                    | 390                        | 3                     | 1               | 0                       |
| Ndc80        | 602                        | Nuf2                    | 393                        | 12                    | 2               | 0                       |
| Ndc80        | 602                        | Nuf2                    | 406                        | 2                     | 1               | 0                       |
| Ndc80        | 611                        | Nuf2                    | 382                        | 68                    | 2               | 0                       |
| Ndc80        | 611                        | Nuf2                    | 388                        | 13                    | 3               | 0                       |
| Ndc80        | 611                        | Nuf2                    | 390                        | 107                   | 4               | 0                       |
| Ndc80        | 611                        | Nuf2                    | 393                        | 76                    | 3               | 0                       |
| Ndc80        | 611                        | Nuf2                    | 406                        | 3                     | 1               | 0                       |
| Ndc80        | 611                        | His <sub>6</sub> -Spc24 | 2                          | 5                     | 1               | 0                       |
| Ndc80        | 613                        | Nuf2                    | 388                        | 27                    | 2               | 0                       |
| Ndc80        | 613                        | Nuf2                    | 393                        | 4                     | 1               | 0                       |
| Ndc80        | 613                        | Nuf2                    | 406                        | 3                     | 1               | 0.001                   |
| Ndc80        | 627                        | Ndc80                   | 632                        | 10                    | 1               | 0                       |

| Protein<br>1            | Position<br>1 <sup>a</sup> | Protein<br>2            | Position<br>2 <sup>a</sup> | No. PSMs <sup>b</sup> | No.<br>Peptides | Best Peptide<br>q-value |
|-------------------------|----------------------------|-------------------------|----------------------------|-----------------------|-----------------|-------------------------|
| Ndc80                   | 627                        | Nuf2                    | 406                        | 1                     | 1               | 0.009                   |
| Ndc80                   | 627                        | Nuf2                    | 409                        | 14                    | 4               | 0                       |
| Ndc80                   | 627                        | Nuf2                    | 415                        | 76                    | 6               | 0                       |
| Ndc80                   | 627                        | Nuf2                    | 419                        | 14                    | 1               | 0.001                   |
| Ndc80                   | 627                        | His <sub>6</sub> -Spc24 | 2                          | 2                     | 1               | 0                       |
| Ndc80                   | 632                        | Nuf2                    | 406                        | 20                    | 2               | 0                       |
| Ndc80                   | 632                        | Nuf2                    | 409                        | 30                    | 4               | 0                       |
| Ndc80                   | 632                        | His <sub>6</sub> -Spc24 | 2                          | 2                     | 1               | 0.005                   |
| Ndc80                   | 632                        | His <sub>6</sub> -Spc24 | 24                         | 20                    | 1               | 0                       |
| Ndc80                   | 641                        | His <sub>6</sub> -Spc24 | 24                         | 64                    | 2               | 0                       |
| Ndc80                   | 641                        | His <sub>6</sub> -Spc24 | 137                        | 3                     | 1               | 0                       |
| Ndc80                   | 655                        | His <sub>6</sub> -Spc24 | 24                         | 23                    | 1               | 0                       |
| Nuf2                    | 187                        | Nuf2                    | 201                        | 1                     | 1               | 0.002                   |
| Nuf2                    | 200                        | Nuf2                    | 204                        | 19                    | 1               | 0                       |
| Nuf2                    | 260                        | Nuf2                    | 271                        | 11                    | 1               | 0                       |
| Nuf2                    | 322                        | Nuf2                    | 331                        | 1                     | 1               | 0                       |
| Nuf2                    | 360                        | Nuf2                    | 366                        | 1                     | 1               | 0.047                   |
| Nuf2                    | 360                        | Nuf2                    | 375                        | 2                     | 1               | 0.013                   |
| Nuf2                    | 360                        | Nuf2                    | 393                        | 1                     | 1               | 0.011                   |
| Nuf2                    | 366                        | Nuf2                    | 375                        | 7                     | 1               | 0.001                   |
| Nuf2                    | 366                        | Nuf2                    | 419                        | 4                     | 1               | 0.003                   |
| Nuf2                    | 375                        | Nuf2                    | 393                        | 1                     | 1               | 0.044                   |
| Nuf2                    | 382                        | Nuf2                    | 393                        | 3                     | 1               | 0                       |
| Nuf2                    | 388                        | Nuf2                    | 388                        | 1                     | 1               | 0                       |
| Nuf2                    | 388                        | Nuf2                    | 393                        | 12                    | 2               | 0                       |
| Nuf2                    | 393                        | His <sub>6</sub> -Spc24 | 2                          | 3                     | 1               | 0.011                   |
| Nuf2                    | 409                        | His <sub>6</sub> -Spc24 | 2                          | 1                     | 1               | 0.001                   |
| Nuf2                    | 415                        | Nuf2                    | 426                        | 16                    | 1               | 0                       |
| His <sub>6</sub> -Spc24 | 2                          | His <sub>6</sub> -Spc24 | 24                         | 50                    | 1               | 0                       |
| His <sub>6</sub> -Spc24 | 2                          | His <sub>6</sub> -Spc24 | 52                         | 11                    | 1               | 0                       |
| His <sub>6</sub> -Spc24 | 24                         | His <sub>6</sub> -Spc24 | 52                         | 1                     | 1               | 0.014                   |
| His <sub>6</sub> -Spc24 | 24                         | His <sub>6</sub> -Spc24 | 118                        | 2                     | 1               | 0.006                   |
| His <sub>6</sub> -Spc24 | 24                         | His <sub>6</sub> -Spc24 | 143                        | 1                     | 1               | 0.003                   |
| His <sub>6</sub> -Spc24 | 24                         | His <sub>6</sub> -Spc24 | 183                        | 2                     | 1               | 0.002                   |
| His <sub>6</sub> -Spc24 | 36                         | His <sub>6</sub> -Spc24 | 62                         | 1                     | 1               | 0.002                   |
| His <sub>6</sub> -Spc24 | 36                         | His <sub>6</sub> -Spc24 | 118                        | 5                     | 1               | 0.001                   |
| His <sub>6</sub> -Spc24 | 36                         | His <sub>6</sub> -Spc24 | 225                        | 4                     | 1               | 0.003                   |
| His <sub>6</sub> -Spc24 | 52                         | His <sub>6</sub> -Spc24 | 62                         | 16                    | 1               | 0                       |
| His <sub>6</sub> -Spc24 | 52                         | His <sub>6</sub> -Spc24 | 118                        | 1                     | 1               | 0.009                   |
| His <sub>6</sub> -Spc24 | 62                         | His <sub>6</sub> -Spc24 | 71                         | 7                     | 2               | 0                       |
| His <sub>6</sub> -Spc24 | 62                         | His <sub>6</sub> -Spc24 | 75                         | 4                     | 1               | 0.009                   |
| His <sub>6</sub> -Spc24 | 62                         | His <sub>6</sub> -Spc24 | 81                         | 1                     | 1               | 0.009                   |
| His <sub>6</sub> -Spc24 | 62                         | His <sub>6</sub> -Spc24 | 82                         | 1                     | 1               | 0.004                   |
| His <sub>6</sub> -Spc24 | 62                         | His <sub>6</sub> -Spc24 | 137                        | 1                     | 1               | 0.001                   |
| His <sub>6</sub> -Spc24 | 62                         | His <sub>6</sub> -Spc24 | 183                        | 4                     | 1               | 0.002                   |
| His <sub>6</sub> -Spc24 | 62                         | His <sub>6</sub> -Spc24 | 225                        | 1                     | 1               | 0.013                   |
| His <sub>6</sub> -Spc24 | 71                         | His <sub>6</sub> -Spc24 | 81                         | 12                    | 1               | 0.014                   |
| His <sub>6</sub> -Spc24 | 71                         | His <sub>6</sub> -Spc24 | 82                         | 6                     | 1               | 0.002                   |

| Protein<br>1            | Position<br>1 <sup>a</sup> | Protein<br>2            | Position<br>2 <sup>a</sup> | No. PSMs <sup>b</sup> | No.<br>Peptides | Best Peptide<br>q-value |
|-------------------------|----------------------------|-------------------------|----------------------------|-----------------------|-----------------|-------------------------|
| His <sub>6</sub> -Spc24 | 71                         | His <sub>6</sub> -Spc24 | 118                        | 1                     | 1               | 0.027                   |
| His <sub>6</sub> -Spc24 | 71                         | His <sub>6</sub> -Spc24 | 137                        | 4                     | 1               | 0.039                   |
| His <sub>6</sub> -Spc24 | 75                         | His <sub>6</sub> -Spc24 | 82                         | 23                    | 1               | 0.005                   |
| His <sub>6</sub> -Spc24 | 82                         | His <sub>6</sub> -Spc24 | 92                         | 18                    | 2               | 0                       |
| His <sub>6</sub> -Spc24 | 82                         | His <sub>6</sub> -Spc24 | 110                        | 4                     | 1               | 0                       |
| His <sub>6</sub> -Spc24 | 82                         | His <sub>6</sub> -Spc24 | 118                        | 4                     | 1               | 0.002                   |
| His <sub>6</sub> -Spc24 | 82                         | His <sub>6</sub> -Spc24 | 137                        | 6                     | 1               | 0.004                   |
| His <sub>6</sub> -Spc24 | 82                         | His <sub>6</sub> -Spc24 | 225                        | 5                     | 1               | 0.01                    |
| His <sub>6</sub> -Spc24 | 92                         | His <sub>6</sub> -Spc24 | 118                        | 5                     | 2               | 0                       |
| His <sub>6</sub> -Spc24 | 92                         | His <sub>6</sub> -Spc24 | 155                        | 1                     | 1               | 0.004                   |
| His <sub>6</sub> -Spc24 | 92                         | His <sub>6</sub> -Spc24 | 225                        | 1                     | 1               | 0.001                   |
| His <sub>6</sub> -Spc24 | 110                        | His <sub>6</sub> -Spc24 | 118                        | 425                   | 1               | 0                       |
| His <sub>6</sub> -Spc24 | 110                        | His <sub>6</sub> -Spc24 | 137                        | 2                     | 1               | 0                       |
| His <sub>6</sub> -Spc24 | 110                        | His <sub>6</sub> -Spc24 | 139                        | 6                     | 1               | 0                       |
| His <sub>6</sub> -Spc24 | 110                        | His <sub>6</sub> -Spc24 | 143                        | 5                     | 1               | 0                       |
| His <sub>6</sub> -Spc24 | 110                        | His <sub>6</sub> -Spc24 | 155                        | 5                     | 1               | 0.004                   |
| His <sub>6</sub> -Spc24 | 110                        | His <sub>6</sub> -Spc24 | 204                        | 1                     | 1               | 0.002                   |
| His <sub>6</sub> -Spc24 | 110                        | His <sub>6</sub> -Spc24 | 225                        | 5                     | 1               | 0                       |
| His <sub>6</sub> -Spc24 | 115                        | His <sub>6</sub> -Spc24 | 225                        | 1                     | 1               | 0.001                   |
| His <sub>6</sub> -Spc24 | 118                        | His <sub>6</sub> -Spc24 | 139                        | 4                     | 1               | 0.016                   |
| His <sub>6</sub> -Spc24 | 118                        | His <sub>6</sub> -Spc24 | 143                        | 6                     | 1               | 0.001                   |
| His <sub>6</sub> -Spc24 | 118                        | His <sub>6</sub> -Spc24 | 155                        | 11                    | 1               | 0.002                   |
| His <sub>6</sub> -Spc24 | 118                        | His <sub>6</sub> -Spc24 | 159                        | 6                     | 1               | 0                       |
| His <sub>6</sub> -Spc24 | 118                        | His <sub>6</sub> -Spc24 | 181                        | 3                     | 1               | 0.001                   |
| His <sub>6</sub> -Spc24 | 118                        | His <sub>6</sub> -Spc24 | 183                        | 8                     | 1               | 0.018                   |
| His <sub>6</sub> -Spc24 | 118                        | His <sub>6</sub> -Spc24 | 204                        | 6                     | 1               | 0                       |
| His <sub>6</sub> -Spc24 | 118                        | His <sub>6</sub> -Spc24 | 223                        | 7                     | 2               | 0.001                   |
| His <sub>6</sub> -Spc24 | 118                        | His <sub>6</sub> -Spc24 | 225                        | 12                    | 1               | 0.001                   |
| His <sub>6</sub> -Spc24 | 137                        | His <sub>6</sub> -Spc24 | 143                        | 10                    | 1               | 0.002                   |
| His <sub>6</sub> -Spc24 | 137                        | His <sub>6</sub> -Spc24 | 155                        | 14                    | 1               | 0.001                   |
| His <sub>6</sub> -Spc24 | 137                        | His <sub>6</sub> -Spc24 | 159                        | 5                     | 1               | 0                       |
| His <sub>6</sub> -Spc24 | 137                        | His <sub>6</sub> -Spc24 | 183                        | 7                     | 1               | 0.017                   |
| His <sub>6</sub> -Spc24 | 137                        | His <sub>6</sub> -Spc24 | 204                        | 2                     | 1               | 0.005                   |
| His <sub>6</sub> -Spc24 | 137                        | His <sub>6</sub> -Spc24 | 225                        | 5                     | 1               | 0.003                   |
| His <sub>6</sub> -Spc24 | 139                        | His <sub>6</sub> -Spc24 | 155                        | 10                    | 1               | 0.002                   |
| His <sub>6</sub> -Spc24 | 139                        | His <sub>6</sub> -Spc24 | 159                        | 12                    | 1               | 0                       |
| His <sub>6</sub> -Spc24 | 139                        | His <sub>6</sub> -Spc24 | 181                        | 2                     | 1               | 0.001                   |
| His <sub>6</sub> -Spc24 | 139                        | His <sub>6</sub> -Spc24 | 204                        | 6                     | 1               | 0                       |
| His <sub>6</sub> -Spc24 | 139                        | His <sub>6</sub> -Spc24 | 223                        | 2                     | 1               | 0.001                   |
| His <sub>6</sub> -Spc24 | 139                        | His <sub>6</sub> -Spc24 | 225                        | 5                     | 1               | 0.013                   |
| His <sub>6</sub> -Spc24 | 143                        | His <sub>6</sub> -Spc24 | 159                        | 23                    | 1               | 0                       |
| His <sub>6</sub> -Spc24 | 143                        | His <sub>6</sub> -Spc24 | 181                        | 1                     | 1               | 0.001                   |
| His <sub>6</sub> -Spc24 | 143                        | His <sub>6</sub> -Spc24 | 183                        | 19                    | 1               | 0                       |
| His <sub>6</sub> -Spc24 | 143                        | His <sub>6</sub> -Spc24 | 204                        | 6                     | 1               | 0                       |
| His <sub>6</sub> -Spc24 | 143                        | His <sub>6</sub> -Spc24 | 223                        | 3                     | 1               | 0.002                   |
| His <sub>6</sub> -Spc24 | 143                        | His <sub>6</sub> -Spc24 | 225                        | 2                     | 1               | 0.007                   |
| His <sub>6</sub> -Spc24 | 155                        | His <sub>6</sub> -Spc24 | 159                        | 4                     | 1               | 0.001                   |
| His <sub>6</sub> -Spc24 | 155                        | His <sub>6</sub> -Spc24 | 181                        | 6                     | 1               | 0.001                   |

| Protein<br>1            | Position<br>1 <sup>a</sup> | Protein<br>2            | Position<br>2 <sup>a</sup> | No. PSMs <sup>b</sup> | No.<br>Peptides | Best Peptide<br>q-value |
|-------------------------|----------------------------|-------------------------|----------------------------|-----------------------|-----------------|-------------------------|
| His <sub>6</sub> -Spc24 | 155                        | His <sub>6</sub> -Spc24 | 183                        | 6                     | 1               | 0.001                   |
| His <sub>6</sub> -Spc24 | 155                        | His <sub>6</sub> -Spc24 | 204                        | 6                     | 1               | 0.002                   |
| His <sub>6</sub> -Spc24 | 155                        | His <sub>6</sub> -Spc24 | 223                        | 3                     | 1               | 0.015                   |
| His <sub>6</sub> -Spc24 | 155                        | His <sub>6</sub> -Spc24 | 225                        | 8                     | 1               | 0.002                   |
| His <sub>6</sub> -Spc24 | 159                        | His <sub>6</sub> -Spc24 | 159                        | 1                     | 1               | 0.004                   |
| His <sub>6</sub> -Spc24 | 159                        | His <sub>6</sub> -Spc24 | 183                        | 19                    | 1               | 0                       |
| His <sub>6</sub> -Spc24 | 159                        | His <sub>6</sub> -Spc24 | 204                        | 7                     | 1               | 0                       |
| His <sub>6</sub> -Spc24 | 159                        | His <sub>6</sub> -Spc24 | 223                        | 1                     | 1               | 0                       |
| His <sub>6</sub> -Spc24 | 159                        | His <sub>6</sub> -Spc24 | 225                        | 8                     | 1               | 0                       |
| His <sub>6</sub> -Spc24 | 181                        | His <sub>6</sub> -Spc24 | 204                        | 5                     | 1               | 0                       |
| His <sub>6</sub> -Spc24 | 181                        | His <sub>6</sub> -Spc24 | 223                        | 1                     | 1               | 0.001                   |
| His <sub>6</sub> -Spc24 | 181                        | His <sub>6</sub> -Spc24 | 225                        | 4                     | 1               | 0                       |
| His <sub>6</sub> -Spc24 | 183                        | His <sub>6</sub> -Spc24 | 204                        | 23                    | 1               | 0                       |
| His <sub>6</sub> -Spc24 | 183                        | His <sub>6</sub> -Spc24 | 223                        | 4                     | 2               | 0.002                   |
| His <sub>6</sub> -Spc24 | 183                        | His <sub>6</sub> -Spc24 | 225                        | 15                    | 1               | 0.007                   |
| His <sub>6</sub> -Spc24 | 204                        | His <sub>6</sub> -Spc24 | 225                        | 11                    | 1               | 0                       |
| His <sub>6</sub> -Spc24 | 223                        | His <sub>6</sub> -Spc24 | 225                        | 1                     | 1               | 0.002                   |
| His <sub>6</sub> -Spc24 | 225                        | His <sub>6</sub> -Spc24 | 225                        | 6                     | 1               | 0.003                   |
| Spc25                   | 2                          | Spc25                   | 19                         | 4                     | 1               | 0                       |
| Spc25                   | 2                          | Ndc80                   | 641                        | 37                    | 1               | 0                       |
| Spc25                   | 2                          | His <sub>6</sub> -Spc24 | 2                          | 15                    | 1               | 0                       |
| Spc25                   | 19                         | Ndc80                   | 655                        | 36                    | 3               | 0                       |
| Spc25                   | 19                         | His <sub>6</sub> -Spc24 | 2                          | 23                    | 1               | 0.001                   |
| Spc25                   | 118                        | Spc25                   | 118                        | 5                     | 1               | 0                       |
| Spc25                   | 118                        | Ndc80                   | 48                         | 4                     | 1               | 0                       |
| Spc25                   | 118                        | Ndc80                   | 89                         | 4                     | 1               | 0                       |
| Spc25                   | 118                        | His <sub>6</sub> -Spc24 | 110                        | 3                     | 1               | 0                       |
| Spc25                   | 118                        | His <sub>6</sub> -Spc24 | 118                        | 3                     | 1               | 0.002                   |
| Spc25                   | 118                        | His <sub>6</sub> -Spc24 | 137                        | 15                    | 1               | 0                       |
| Spc25                   | 118                        | His <sub>6</sub> -Spc24 | 139                        | 8                     | 1               | 0.004                   |
| Spc25                   | 118                        | His <sub>6</sub> -Spc24 | 143                        | 25                    | 1               | 0                       |
| Spc25                   | 118                        | His <sub>6</sub> -Spc24 | 155                        | 17                    | 1               | 0.001                   |
| Spc25                   | 118                        | His <sub>6</sub> -Spc24 | 159                        | 19                    | 1               | 0                       |
| Spc25                   | 118                        | His <sub>6</sub> -Spc24 | 181                        | 1                     | 1               | 0.002                   |
| Spc25                   | 118                        | His <sub>6</sub> -Spc24 | 183                        | 10                    | 1               | 0.004                   |
| Spc25                   | 118                        | His <sub>6</sub> -Spc24 | 204                        | 13                    | 1               | 0                       |
| Spc25                   | 118                        | His <sub>6</sub> -Spc24 | 223                        | 4                     | 2               | 0.001                   |
| Spc25                   | 118                        | His <sub>6</sub> -Spc24 | 225                        | 8                     | 1               | 0                       |

<sup>a</sup>Wild-type sequence of Spc24 starts at residue 21 due to presence of His<sub>6</sub> tag

<sup>b</sup>PSM, peptide spectrum match

**Table S5 Recombinant Ndc80 complex loop-links**

| Protein | Position 1 <sup>a</sup> | Position 2 <sup>a</sup> | No. PSMs <sup>b</sup> | No. Peptides | Best Peptide q-value |
|---------|-------------------------|-------------------------|-----------------------|--------------|----------------------|
| Ndc80   | 67                      | 69                      | 19                    | 1            | 0                    |
| Ndc80   | 137                     | 138                     | 41                    | 4            | 0                    |
| Ndc80   | 137                     | 140                     | 8                     | 2            | 0                    |
| Ndc80   | 138                     | 140                     | 18                    | 2            | 0                    |
| Ndc80   | 152                     | 155                     | 25                    | 2            | 0                    |
| Ndc80   | 332                     | 338                     | 6                     | 1            | 0                    |
| Ndc80   | 338                     | 342                     | 20                    | 3            | 0                    |
| Ndc80   | 342                     | 344                     | 7                     | 1            | 0.002                |
| Ndc80   | 349                     | 351                     | 3                     | 2            | 0.002                |
| Ndc80   | 351                     | 354                     | 37                    | 6            | 0                    |
| Ndc80   | 354                     | 359                     | 14                    | 2            | 0                    |
| Ndc80   | 359                     | 368                     | 4                     | 2            | 0.002                |
| Ndc80   | 359                     | 370                     | 8                     | 2            | 0.002                |
| Ndc80   | 368                     | 370                     | 2                     | 1            | 0                    |
| Ndc80   | 370                     | 377                     | 8                     | 1            | 0.002                |
| Ndc80   | 377                     | 380                     | 32                    | 1            | 0.001                |
| Ndc80   | 380                     | 382                     | 2                     | 1            | 0.001                |
| Ndc80   | 382                     | 388                     | 7                     | 1            | 0                    |
| Ndc80   | 382                     | 393                     | 1                     | 1            | 0.002                |
| Ndc80   | 388                     | 393                     | 1                     | 1            | 0.001                |
| Ndc80   | 393                     | 404                     | 28                    | 3            | 0                    |
| Ndc80   | 404                     | 408                     | 20                    | 1            | 0                    |
| Ndc80   | 408                     | 409                     | 24                    | 1            | 0                    |
| Ndc80   | 432                     | 439                     | 1                     | 1            | 0.001                |
| Ndc80   | 439                     | 445                     | 14                    | 2            | 0                    |
| Ndc80   | 445                     | 448                     | 15                    | 3            | 0                    |
| Ndc80   | 448                     | 456                     | 7                     | 1            | 0                    |
| Ndc80   | 513                     | 522                     | 8                     | 1            | 0                    |
| Ndc80   | 513                     | 523                     | 9                     | 1            | 0                    |
| Ndc80   | 522                     | 523                     | 14                    | 3            | 0                    |
| Ndc80   | 522                     | 527                     | 1                     | 1            | 0.001                |
| Ndc80   | 523                     | 527                     | 20                    | 1            | 0                    |
| Ndc80   | 537                     | 541                     | 5                     | 1            | 0.001                |
| Ndc80   | 537                     | 548                     | 1                     | 1            | 0.023                |
| Ndc80   | 541                     | 548                     | 3                     | 2            | 0.001                |
| Ndc80   | 548                     | 551                     | 26                    | 4            | 0                    |
| Ndc80   | 548                     | 554                     | 2                     | 2            | 0.001                |
| Ndc80   | 551                     | 554                     | 60                    | 4            | 0                    |
| Ndc80   | 554                     | 560                     | 6                     | 1            | 0                    |
| Ndc80   | 560                     | 566                     | 9                     | 3            | 0                    |
| Ndc80   | 566                     | 577                     | 4                     | 1            | 0.002                |
| Ndc80   | 598                     | 601                     | 18                    | 2            | 0                    |
| Ndc80   | 601                     | 602                     | 12                    | 2            | 0                    |
| Ndc80   | 602                     | 611                     | 1                     | 1            | 0.002                |
| Ndc80   | 602                     | 613                     | 2                     | 2            | 0.002                |
| Ndc80   | 611                     | 613                     | 12                    | 3            | 0                    |
| Ndc80   | 638                     | 641                     | 60                    | 1            | 0                    |

| Protein                 | Position 1 <sup>a</sup> | Position 2 <sup>a</sup> | No. PSMs <sup>b</sup> | No. Peptides | Best Peptide q-value |
|-------------------------|-------------------------|-------------------------|-----------------------|--------------|----------------------|
| Nuf2                    | 187                     | 193                     | 2                     | 1            | 0.005                |
| Nuf2                    | 193                     | 200                     | 30                    | 1            | 0                    |
| Nuf2                    | 200                     | 201                     | 62                    | 3            | 0                    |
| Nuf2                    | 200                     | 204                     | 1                     | 1            | 0.002                |
| Nuf2                    | 201                     | 204                     | 23                    | 1            | 0                    |
| Nuf2                    | 217                     | 220                     | 97                    | 1            | 0                    |
| Nuf2                    | 220                     | 225                     | 3                     | 1            | 0                    |
| Nuf2                    | 243                     | 246                     | 76                    | 3            | 0                    |
| Nuf2                    | 270                     | 271                     | 7                     | 1            | 0                    |
| Nuf2                    | 322                     | 329                     | 52                    | 2            | 0                    |
| Nuf2                    | 356                     | 360                     | 48                    | 2            | 0                    |
| Nuf2                    | 360                     | 366                     | 1                     | 1            | 0.001                |
| Nuf2                    | 375                     | 382                     | 24                    | 1            | 0                    |
| Nuf2                    | 382                     | 388                     | 12                    | 2            | 0                    |
| Nuf2                    | 382                     | 390                     | 13                    | 2            | 0                    |
| Nuf2                    | 382                     | 393                     | 3                     | 1            | 0.001                |
| Nuf2                    | 388                     | 390                     | 112                   | 3            | 0                    |
| Nuf2                    | 388                     | 393                     | 18                    | 2            | 0                    |
| Nuf2                    | 390                     | 393                     | 96                    | 2            | 0                    |
| Nuf2                    | 406                     | 409                     | 39                    | 2            | 0                    |
| Nuf2                    | 409                     | 415                     | 1                     | 1            | 0.003                |
| Nuf2                    | 415                     | 419                     | 39                    | 2            | 0                    |
| Nuf2                    | 419                     | 426                     | 15                    | 1            | 0                    |
| His <sub>6</sub> -Spc24 | 71                      | 75                      | 26                    | 2            | 0                    |
| His <sub>6</sub> -Spc24 | 75                      | 81                      | 3                     | 2            | 0.002                |
| His <sub>6</sub> -Spc24 | 75                      | 82                      | 2                     | 1            | 0.004                |
| His <sub>6</sub> -Spc24 | 81                      | 82                      | 15                    | 2            | 0                    |
| His <sub>6</sub> -Spc24 | 92                      | 110                     | 10                    | 2            | 0.001                |
| His <sub>6</sub> -Spc24 | 110                     | 115                     | 20                    | 2            | 0                    |
| His <sub>6</sub> -Spc24 | 110                     | 118                     | 21                    | 1            | 0                    |
| His <sub>6</sub> -Spc24 | 115                     | 118                     | 30                    | 2            | 0                    |
| His <sub>6</sub> -Spc24 | 137                     | 139                     | 13                    | 2            | 0                    |
| His <sub>6</sub> -Spc24 | 137                     | 143                     | 8                     | 1            | 0                    |
| His <sub>6</sub> -Spc24 | 139                     | 143                     | 33                    | 1            | 0                    |
| His <sub>6</sub> -Spc24 | 155                     | 157                     | 22                    | 3            | 0                    |
| His <sub>6</sub> -Spc24 | 157                     | 159                     | 33                    | 1            | 0                    |
| His <sub>6</sub> -Spc24 | 181                     | 183                     | 18                    | 1            | 0                    |
| His <sub>6</sub> -Spc24 | 223                     | 225                     | 17                    | 2            | 0                    |

<sup>a</sup>Wild-type sequence of Spc24 starts at residue 21 due to presence of His<sub>6</sub> tag

<sup>b</sup>PSM, peptide spectrum match

## Literature Cited

- GEISER, J. R., H. A. SUNDBERG, B. H. CHANG, E. G. MULLER and T. N. DAVIS, 1993 The essential mitotic target of calmodulin is the 110-kilodalton component of the spindle pole body in *Saccharomyces cerevisiae*. *Mol Cell Biol* **13**: 7913-7924.
- GREENLAND, K. B., H. DING, M. COSTANZO, C. BOONE and T. N. DAVIS, 2010 Identification of *Saccharomyces cerevisiae* spindle pole body remodeling factors. *PLoS One* **5**: e15426.
- MCDONNELL, A. V., T. JIANG, A. E. KEATING and B. BERGER, 2006 Paircoil2: improved prediction of coiled coils from sequence. *Bioinformatics* **22**: 356-358.
- WARGACKI, M. M., J. C. TAY, E. G. MULLER, C. L. ASBURY and T. N. DAVIS, 2010 Kip3, the yeast kinesin-8, is required for clustering of kinetochores at metaphase. *Cell Cycle* **9**: 2581-2588.
